# Supplementary material for: A Halomanganates(II) with P,P’-Diprotonated Bis(2-Diphenylphosphinophenyl)ether: Wavelength-Excitation Dependence of the Quantum Yield and Role of the Non-Covalent Interactions
Source: MDPI journal article supplement (doi:10.3390/ijms22136873), 2021-06-26
Supplement: s1 [file s1]

# Electronic Supplementary Information

**A halomanganates(II) with P,P'-diprotonated bis(2-diphenylphosphinophenyl)ether: wavelength-excitation dependence of the quantum yield and role of the hydrogen bonds.**

Alexey S. Berezin

**Table S1.** X-Ray crystallographic data for **1** and **2**.

| <b>Compound</b>                                | <b>1</b>                                                          | <b>2</b>                                                          |
|------------------------------------------------|-------------------------------------------------------------------|-------------------------------------------------------------------|
| Formula                                        | C <sub>36</sub> H <sub>30</sub> Br <sub>4</sub> MnOP <sub>2</sub> | C <sub>36</sub> H <sub>30</sub> Cl <sub>4</sub> MnOP <sub>2</sub> |
| <i>D</i> <sub>calc.</sub> / g cm <sup>-3</sup> | 1.679                                                             | 1.408                                                             |
| <i>μ</i> /mm <sup>-1</sup>                     | 9.184                                                             | 6.999                                                             |
| Formula Weight                                 | 915.12                                                            | 737.28                                                            |
| Colour                                         | fluorescent<br>colourless                                         | clear colourless                                                  |
| Shape                                          | prism                                                             | prism                                                             |
| Size/mm <sup>3</sup>                           | 0.20×0.12×0.07                                                    | 0.13×0.09×0.08                                                    |
| <i>T</i> /K                                    | 123.01(10)                                                        | 100.01(11)                                                        |
| Crystal System                                 | triclinic                                                         | triclinic                                                         |
| Space Group                                    | <i>P</i> -1                                                       | <i>P</i> -1                                                       |
| <i>a</i> /Å                                    | 11.32210(10)                                                      | 11.1612(2)                                                        |
| <i>b</i> /Å                                    | 18.08890(10)                                                      | 18.0152(2)                                                        |
| <i>c</i> /Å                                    | 20.11190(10)                                                      | 19.7961(3)                                                        |
| <i>α</i> /°                                    | 110.8450(10)                                                      | 112.2100(10)                                                      |
| <i>β</i> /°                                    | 91.6360(10)                                                       | 90.4110(10)                                                       |
| <i>γ</i> /°                                    | 107.8460(10)                                                      | 107.6010(10)                                                      |
| <i>V</i> /Å <sup>3</sup>                       | 3620.08(5)                                                        | 3479.14(9)                                                        |
| <i>Z</i>                                       | 4                                                                 | 4                                                                 |
| <i>Z'</i>                                      | 2                                                                 | 2                                                                 |
| Wavelength/Å                                   | 1.54184                                                           | 1.54184                                                           |
| Radiation type                                 | Cu K <sub>α</sub>                                                 | Cu K <sub>α</sub>                                                 |
| <i>θ</i> <sub>min</sub> /°                     | 2.379                                                             | 2.434                                                             |
| <i>θ</i> <sub>max</sub> /°                     | 75.320                                                            | 73.554                                                            |
| Measured Refl's.                               | 60699                                                             | 43979                                                             |
| Indep't Refl's                                 | 14716                                                             | 13275                                                             |
| Refl's I≥2 σ(I)                                | 13314                                                             | 11202                                                             |
| <i>R</i> <sub>int</sub>                        | 0.0255                                                            | 0.0662                                                            |
| Parameters                                     | 1154                                                              | 930                                                               |
| Restraints                                     | 800                                                               | 361                                                               |
| Largest Peak                                   | 0.866                                                             | 1.265                                                             |
| Deepest Hole                                   | -0.774                                                            | -0.871                                                            |
| GooF                                           | 1.049                                                             | 1.091                                                             |
| <i>wR</i> <sub>2</sub> (all data)              | 0.1082                                                            | 0.2514                                                            |
| <i>wR</i> <sub>2</sub>                         | 0.1061                                                            | 0.2231                                                            |
| <i>R</i> <sub>I</sub> (all data)               | 0.0425                                                            | 0.0846                                                            |
| <i>R</i> <sub>I</sub>                          | 0.0391                                                            | 0.0702                                                            |

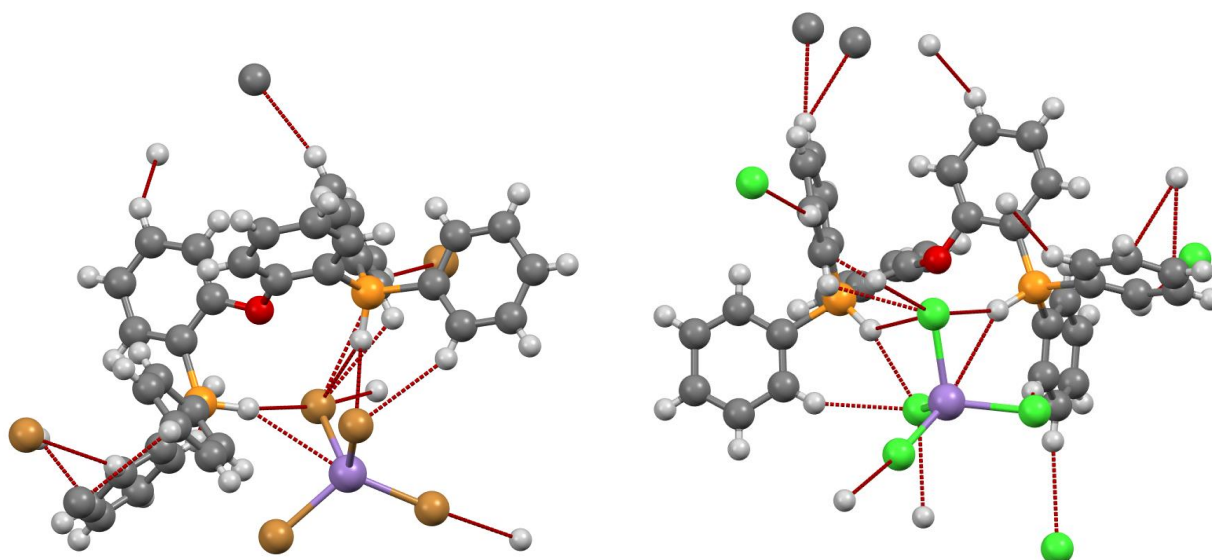

**Fig. S1.** Molecule structure of **1** (left) and **2** (right). Red dotted lines show short contacts.

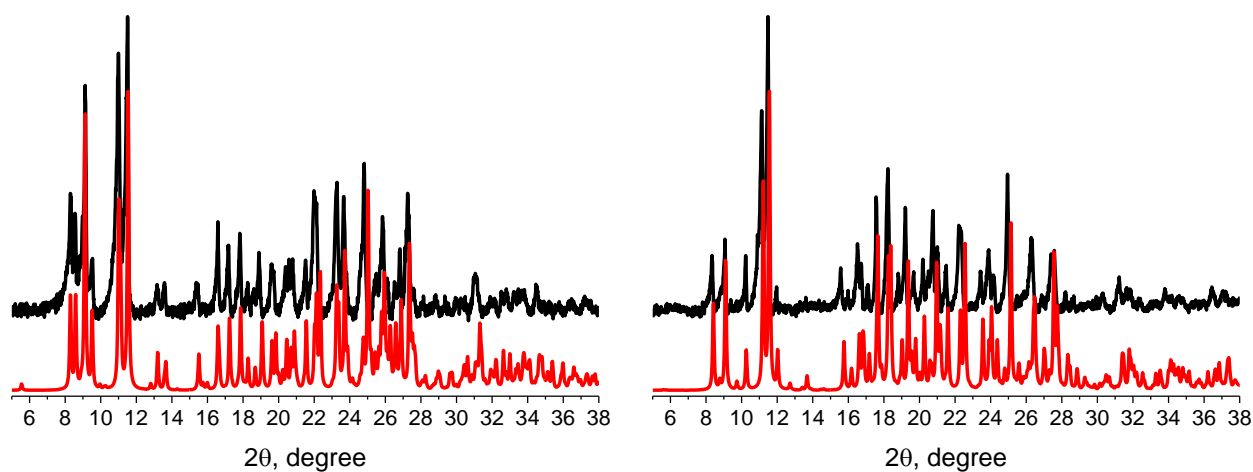

**Fig. S2.** Comparison of experimental (black) XRPD patterns of **1** (left) and **2** (right) with the diffraction pattern, simulated for the crystal structure (red).

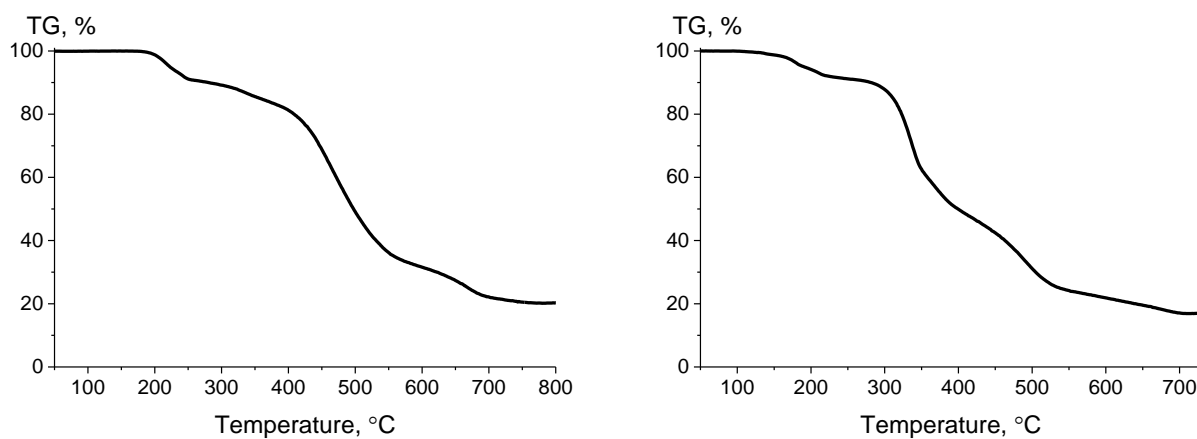

**Fig. S3.** TG curves of **1** (left) and **2** (right).

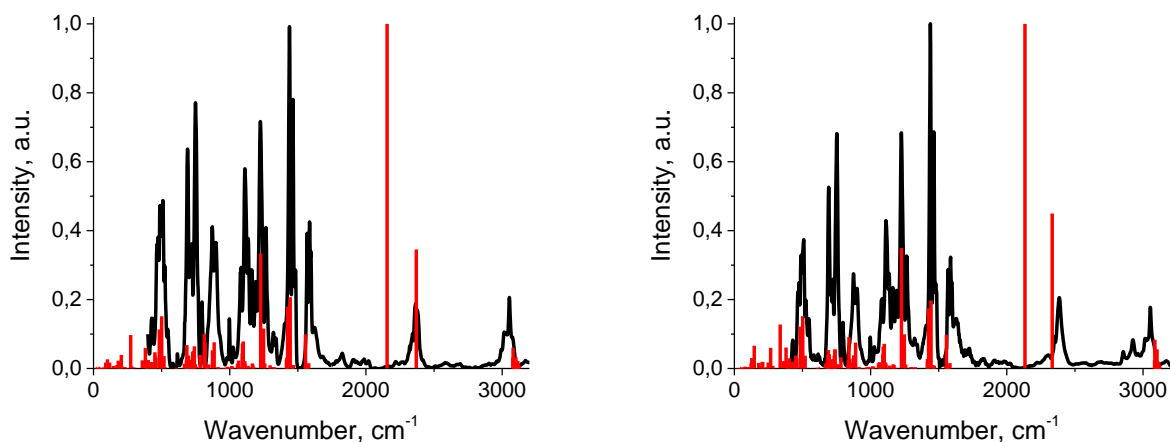

**Fig. S4.** Experimental (black) IR spectra of **1** (left) and **2** (right) with the calculated IR vibrations (red).

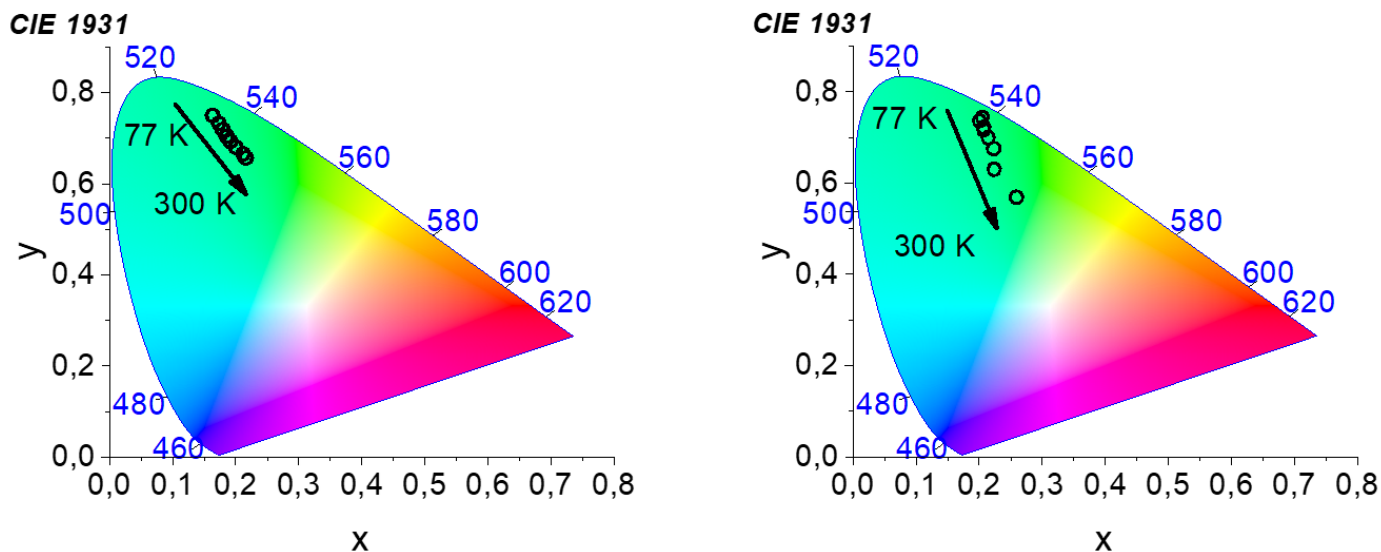

**Fig. S5.** Temperature dependences of the photoluminescence chromaticity of **1** ( $\lambda_{\text{ex}} = 453$  nm) and **2** ( $\lambda_{\text{ex}} = 447$  nm).

**Table S2.** Fractional Atomic Coordinates ( $\times 10^4$ ) and Equivalent Isotropic Displacement Parameters ( $\text{\AA}^2 \times 10^3$ ) for **1**.  $U_{eq}$  is defined as 1/3 of the trace of the orthogonalised  $U_{ij}$ .

| Atom | x           | y          | z           | $U_{eq}$  |
|------|-------------|------------|-------------|-----------|
| Br8  | 12368(2)    | 6570.6(14) | 440.4(11)   | 25.6(2)   |
| Br7  | 13051.8(14) | 8190.9(7)  | -529.9(7)   | 26.9(2)   |
| Br2  | 7376.9(14)  | 8189.0(9)  | 4571.6(9)   | 29.0(2)   |
| Br5  | 14306(2)    | 8984.0(9)  | 1627.3(10)  | 30.4(2)   |
| Br3  | 5265.7(13)  | 5808.6(9)  | 3384.7(7)   | 33.0(2)   |
| Br1  | 6475.5(13)  | 6563.9(7)  | 5548.7(5)   | 33.3(2)   |
| Br6  | 10474.4(14) | 8304.5(9)  | 887.9(6)    | 35.6(2)   |
| Br4  | 9056.3(13)  | 6383.6(9)  | 4175.5(4)   | 45.2(2)   |
| Mn2  | 12490.0(18) | 8065.0(12) | 646.1(9)    | 21.2(3)   |
| Mn1  | 7071.4(12)  | 6671.4(8)  | 4383.7(4)   | 24.5(2)   |
| P3   | 5974.2(7)   | 7506.5(5)  | 340.9(4)    | 21.95(16) |
| P2   | 3883.4(8)   | 7519.4(5)  | 4687.8(4)   | 23.28(16) |
| P4   | 1962.8(7)   | 5990.0(5)  | -1635.6(4)  | 22.76(16) |
| P1   | 7832.1(8)   | 8899.1(5)  | 6718.7(4)   | 25.54(17) |
| O2   | 4533(2)     | 6404.6(15) | -1066.9(11) | 26.2(5)   |
| O1   | 5323(2)     | 8632.1(15) | 6103.6(11)  | 27.3(5)   |
| C43  | 6846(3)     | 8294(2)    | 32.4(17)    | 27.5(5)   |
| C56  | 3267(3)     | 6290.9(19) | -2075.6(16) | 22.8(6)   |
| C20  | 6481(3)     | 8774(2)    | 7162.6(17)  | 26.9(7)   |

| Atom | x        | y          | z           | $U_{eq}$ |
|------|----------|------------|-------------|----------|
| C7   | 2951(3)  | 6798(2)    | 5045.7(18)  | 30.1(5)  |
| C13  | 3912(3)  | 8566(2)    | 5181.3(17)  | 25.5(6)  |
| C49  | 6072(3)  | 6504.3(19) | -192.5(17)  | 24.4(6)  |
| C67  | 1674(3)  | 4940(2)    | -1687.5(16) | 23.8(6)  |
| C50  | 5368(3)  | 6063(2)    | -881.1(17)  | 23.7(6)  |
| C14  | 4596(3)  | 9013(2)    | 5873.4(17)  | 25.3(6)  |
| C37  | 6555(3)  | 7770(2)    | 1259.5(16)  | 24.3(6)  |
| C55  | 4453(3)  | 6429(2)    | -1747.3(16) | 23.7(6)  |
| C1   | 3263(3)  | 7228(2)    | 3770.1(16)  | 24.5(6)  |
| C25  | 8353(3)  | 9894(2)    | 6637.1(18)  | 28.3(5)  |
| C68  | 2026(3)  | 4382(2)    | -2251.6(19) | 30.5(7)  |
| C19  | 5339(3)  | 8674(2)    | 6808.1(17)  | 27.5(7)  |
| C44  | 7901(11) | 8265(6)    | -250(5)     | 28.8(6)  |
| C48  | 6446(10) | 8997(7)    | 172(6)      | 27.8(6)  |
| C51  | 5479(3)  | 5313(2)    | -1335.7(18) | 30.7(7)  |
| C57  | 3139(3)  | 6348(2)    | -2745.8(18) | 32.4(8)  |
| C21  | 6539(4)  | 8778(2)    | 7858.8(19)  | 38.1(9)  |
| C32  | 9720(4)  | 9470(3)    | 7865(2)     | 38.3(5)  |
| C58  | 4173(4)  | 6513(2)    | -3080.9(19) | 37.8(9)  |
| C72  | 1001(3)  | 4673(2)    | -1195.4(18) | 31.9(7)  |
| C59  | 5344(3)  | 6646(2)    | -2750.1(19) | 35.2(8)  |
| C8   | 3087(8)  | 6034(5)    | 4910(4)     | 30.3(6)  |
| C54  | 6887(4)  | 6176(2)    | 44(2)       | 41.2(9)  |
| C18  | 3231(4)  | 8939(2)    | 4893(2)     | 39.6(9)  |
| C15  | 4569(3)  | 9803(2)    | 6288.9(19)  | 34.3(8)  |
| C60  | 5501(3)  | 6615(2)    | -2076.1(19) | 31.9(7)  |
| C26  | 8064(7)  | 10563(5)   | 7037(4)     | 29.2(6)  |
| C61  | 562(3)   | 6030(2)    | -2032(2)    | 38.8(6)  |
| C12  | 1979(9)  | 7005(5)    | 5432(5)     | 31.3(6)  |
| C52  | 6309(4)  | 5008(2)    | -1094(2)    | 40.2(9)  |
| C46  | 8200(11) | 9601(6)    | -347(5)     | 28.2(7)  |
| C38  | 5952(4)  | 7261(3)    | 1608(2)     | 38.8(9)  |
| C2   | 2049(4)  | 6694(2)    | 3493(2)     | 41.5(9)  |
| C47  | 7125(11) | 9635(5)    | -30(4)      | 27.8(6)  |
| C24  | 4270(3)  | 8584(2)    | 7130.3(19)  | 34.9(8)  |
| C4   | 2307(4)  | 6825(2)    | 2358.4(19)  | 37.5(8)  |
| C9   | 2301(10) | 5458(4)    | 5159(4)     | 30.8(6)  |
| C33  | 10613(7) | 9423(4)    | 8287(4)     | 39.7(6)  |
| C71  | 710(3)   | 3831(2)    | -1277(2)    | 36.9(9)  |
| C42  | 7573(4)  | 8484(2)    | 1626.9(19)  | 39.4(9)  |
| C10  | 1359(8)  | 5651(6)    | 5522(4)     | 31.1(7)  |
| C5   | 3491(4)  | 7368(3)    | 2636(2)     | 45.5(10) |
| C31  | 9064(4)  | 8806(3)    | 7228(2)     | 39.4(5)  |
| C39  | 6369(4)  | 7471(3)    | 2327(2)     | 41.3(9)  |
| C23  | 4345(4)  | 8600(3)    | 7827(2)     | 43.4(10) |
| C70  | 1059(4)  | 3280(2)    | -1836(2)    | 39.8(9)  |
| C45  | 8594(8)  | 8919(7)    | -450(5)     | 29.1(6)  |
| C22  | 5467(4)  | 8696(3)    | 8186(2)     | 44.7(10) |
| C40  | 7378(4)  | 8184(3)    | 2694.1(19)  | 40.5(9)  |
| C69  | 1692(4)  | 3545(2)    | -2326(2)    | 41.1(9)  |
| C17  | 3206(4)  | 9730(3)    | 5305(2)     | 49.7(11) |
| C53  | 7004(4)  | 5430(3)    | -408(2)     | 47.6(11) |
| C6   | 3986(4)  | 7568(3)    | 3339(2)     | 43.3(10) |
| C41  | 7973(5)  | 8688(3)    | 2349(2)     | 49.9(11) |
| C11  | 1191(6)  | 6419(6)    | 5652(4)     | 31.5(7)  |
| C3   | 1567(4)  | 6494(3)    | 2784(2)     | 49.3(11) |
| C30  | 9168(6)  | 9911(4)    | 6119(4)     | 28.8(6)  |

| Atom | x         | y        | z        | $U_{eq}$ |
|------|-----------|----------|----------|----------|
| C16  | 3863(4)   | 10148(3) | 5997(2)  | 45.2(10) |
| C63  | -1172(6)  | 5477(4)  | -2988(4) | 40.3(6)  |
| C28  | 9376(6)   | 11377(5) | 6450(4)  | 29.6(6)  |
| C29  | 9660(6)   | 10683(4) | 6039(3)  | 29.5(6)  |
| C27  | 8587(6)   | 11326(4) | 6953(4)  | 29.8(6)  |
| C34  | 10862(5)  | 8634(3)  | 8074(3)  | 40.7(6)  |
| C66  | -103(5)   | 6483(4)  | -1557(4) | 40.9(7)  |
| C36  | 9291(5)   | 8038(4)  | 7021(3)  | 40.9(6)  |
| C64  | -1806(5)  | 5938(4)  | -2550(3) | 42.3(6)  |
| C35  | 10190(5)  | 7960(4)  | 7446(3)  | 41.8(6)  |
| C65  | -1275(5)  | 6438(4)  | -1827(3) | 42.9(7)  |
| Br4A | 9415(5)   | 6631(4)  | 4131(3)  | 48.6(6)  |
| Mn1A | 7402(5)   | 6872(3)  | 4381(3)  | 29       |
| Br2A | 7572(7)   | 8367(4)  | 4576(4)  | 27.6(6)  |
| Br1A | 6841(5)   | 6729(3)  | 5535(3)  | 34.5(6)  |
| Br3A | 5585(5)   | 5949(4)  | 3401(4)  | 33.9(6)  |
| Br5A | 14624(6)  | 9117(7)  | 1617(5)  | 30.3(7)  |
| Br6A | 10797(5)  | 8513(4)  | 837(3)   | 38.0(6)  |
| Mn2A | 12740(20) | 8249(7)  | 636(8)   | 21.1(7)  |
| Br8A | 12508(18) | 6749(5)  | 444(7)   | 25.2(7)  |
| Br7A | 13244(12) | 8360(6)  | -550(6)  | 26.6(6)  |
| Br8B | 12610(20) | 6670(30) | 405(14)  | 25.2(7)  |
| Br5B | 14400(40) | 9130(17) | 1575(14) | 30.3(7)  |
| Mn2B | 12850(30) | 8180(30) | 609(15)  | 21.1(7)  |
| Br7B | 13522(12) | 8369(9)  | -512(7)  | 26.9(7)  |
| Br6B | 10510(20) | 8199(13) | 725(10)  | 36.5(6)  |
| C26A | 8043(13)  | 10573(9) | 7211(6)  | 29.0(6)  |
| C27A | 8442(10)  | 11381(7) | 7216(7)  | 29.6(6)  |
| C28A | 9128(11)  | 11547(7) | 6688(7)  | 29.8(6)  |
| C29A | 9441(10)  | 10973(9) | 6176(6)  | 29.6(6)  |
| C30A | 9057(11)  | 10131(7) | 6146(6)  | 29.1(6)  |
| C44A | 7917(18)  | 8133(10) | -333(9)  | 28.8(7)  |
| C45A | 8663(13)  | 8714(11) | -542(8)  | 29.0(7)  |
| C46A | 8435(14)  | 9447(11) | -431(7)  | 28.5(7)  |
| C47A | 7443(19)  | 9617(8)  | -124(8)  | 28.0(6)  |
| C48A | 6620(16)  | 9017(13) | 115(10)  | 27.9(6)  |
| C12A | 1960(20)  | 6858(12) | 5340(11) | 31.2(7)  |
| C11A | 1257(15)  | 6179(16) | 5568(9)  | 31.3(7)  |
| C10A | 1640(20)  | 5524(11) | 5419(10) | 30.9(7)  |
| C9A  | 2640(20)  | 5433(10) | 5084(9)  | 30.6(7)  |
| C8A  | 3358(19)  | 6048(14) | 4887(11) | 30.3(7)  |
| C66A | 129(14)   | 6718(10) | -1765(9) | 41.6(7)  |
| C65A | -925(13)  | 6740(9)  | -2126(8) | 42.4(7)  |
| C64A | -1403(13) | 6138(9)  | -2847(8) | 41.7(7)  |
| C63A | -862(14)  | 5540(11) | -3149(9) | 40.2(7)  |
| C62  | 34(3)     | 5500(2)  | -2743(2) | 38.2(6)  |
| C36A | 9741(17)  | 8259(11) | 6813(10) | 41.0(6)  |
| C35A | 10741(17) | 8224(11) | 7240(10) | 41.3(6)  |
| C34A | 11328(17) | 8877(11) | 7865(10) | 41.0(6)  |
| C33A | 10730(20) | 9269(14) | 8217(14) | 40.0(6)  |

**Table S3.** Fractional Atomic Coordinates ( $\times 10^4$ ) and Equivalent Isotropic Displacement Parameters ( $\text{\AA}^2 \times 10^3$ ) for **2**.  $U_{eq}$  is defined as 1/3 of the trace of the orthogonalised  $U_{ij}$ .

| Atom | x         | y          | z        | $U_{eq}$  |
|------|-----------|------------|----------|-----------|
| Mn01 | 5631.0(5) | -1849.6(4) | 652.3(3) | 28.24(19) |

| Atom | x          | y          | z           | $U_{eq}$  |
|------|------------|------------|-------------|-----------|
| Mn02 | 10520.9(5) | 3268.2(4)  | 5615.4(3)   | 29.73(19) |
| Cl03 | 4320.5(8)  | -3274.5(5) | 426.7(4)    | 29.3(2)   |
| P1   | 8940.0(8)  | 1097.9(5)  | 3315.7(5)   | 22.7(2)   |
| P4   | 5949.9(7)  | 3941.4(5)  | 1618.2(4)   | 21.0(2)   |
| P3   | 8508.3(7)  | 2531.9(5)  | -359.8(4)   | 21.2(2)   |
| Cl2  | 9290.6(8)  | 1833.2(6)  | 5412.5(5)   | 30.9(2)   |
| P2   | 6385.3(8)  | 2464.6(5)  | 5341.9(4)   | 21.8(2)   |
| Cl5  | 4750.8(9)  | -1009.7(6) | 1598.7(5)   | 35.8(2)   |
| Cl1  | 10020.3(9) | 3347.4(6)  | 4480.3(5)   | 36.6(2)   |
| Cl6  | 5190.4(9)  | -1747.4(6) | -488.6(5)   | 34.4(2)   |
| Cl4  | 9639.3(9)  | 4097.0(6)  | 6570.4(5)   | 37.6(2)   |
| Cl7  | 7799.8(10) | -1639(2)   | 892.0(9)    | 45.1(6)   |
| Cl3  | 12706.1(9) | 3539.9(9)  | 5842.3(6)   | 51.2(3)   |
| O2   | 8181(2)    | 3585.3(16) | 1091.0(12)  | 24.6(5)   |
| O1   | 6653(2)    | 1365.3(16) | 3881.0(12)  | 24.2(5)   |
| C54  | 9373(3)    | 3955(2)    | 935.8(18)   | 22.5(6)   |
| C19  | 5523(3)    | 982(2)     | 4084.7(19)  | 23.2(7)   |
| C25  | 6248(3)    | 3223(2)    | 5002.6(18)  | 25.3(7)   |
| C61  | 7012(3)    | 3680(2)    | 2091.6(18)  | 22.7(6)   |
| C43  | 8552(3)    | 1717(2)    | -67.6(18)   | 25.5(7)   |
| C55  | 6662(3)    | 4985(2)    | 1647.9(18)  | 23.2(6)   |
| C67  | 4531(3)    | 3910(2)    | 2040(2)     | 34.6(6)   |
| C49  | 9632(3)    | 3527(2)    | 230.0(18)   | 23.9(7)   |
| C7   | 7703(3)    | 1219(2)    | 2831.2(19)  | 26.8(7)   |
| C8   | 6636(3)    | 1321(2)    | 3164.5(19)  | 27.1(7)   |
| C53  | 10233(3)   | 4694(2)    | 1437(2)     | 28.4(7)   |
| C44  | 9698(4)    | 1753(3)    | 252(2)      | 35.5(8)   |
| C31  | 6052(3)    | 2746(2)    | 6271.6(19)  | 24.6(7)   |
| C62  | 8088(3)    | 3559(2)    | 1781.4(18)  | 24.1(7)   |
| C20  | 5310(3)    | 1430(2)    | 4795.8(19)  | 25.5(7)   |
| C26  | 5090(4)    | 3127(3)    | 4646(2)     | 33.9(8)   |
| C37  | 8860(3)    | 2290(2)    | -1282.5(19) | 24.3(7)   |
| C30  | 7301(4)    | 3959(2)    | 5151(2)     | 32.4(8)   |
| C68  | 4595(3)    | 4492(2)    | 2757(2)     | 33.8(6)   |
| C1   | 10277(3)   | 1162(3)    | 2816(2)     | 36.5(6)   |
| C66  | 6846(3)    | 3622(2)    | 2767.3(19)  | 29.9(8)   |
| C34  | 5533(3)    | 3148(3)    | 7707(2)     | 33.2(8)   |
| C56  | 7540(3)    | 5597(2)    | 2239(2)     | 32.7(8)   |
| C2   | 10204(3)   | 489(3)     | 2152(2)     | 34.3(6)   |
| C48  | 7452(4)    | 1025(2)    | -202(2)     | 31.8(8)   |
| C32  | 5450(4)    | 3338(2)    | 6574(2)     | 34.5(8)   |
| C50  | 10787(4)   | 3885(3)    | 19(2)       | 38.0(9)   |
| C40  | 9312(3)    | 1906(3)    | -2727(2)    | 32.6(8)   |
| C60  | 6223(3)    | 5201(2)    | 1109(2)     | 30.7(8)   |
| C12  | 7765(4)    | 1219(3)    | 2126(2)     | 36.5(9)   |
| C24  | 4679(4)    | 202(3)     | 3624(2)     | 36.0(9)   |
| C47  | 7510(4)    | 375(3)     | 6(2)        | 38.9(9)   |
| C28  | 6037(5)    | 4483(3)    | 4569(2)     | 41.9(10)  |
| C65  | 7752(4)    | 3468(3)    | 3134(2)     | 36.6(9)   |
| C63  | 8984(4)    | 3382(3)    | 2126(2)     | 32.3(8)   |
| C38  | 9169(4)    | 1569(3)    | -1664(2)    | 39.0(9)   |
| C58  | 7588(4)    | 6648(3)    | 1766(2)     | 39.7(10)  |
| C64  | 8812(4)    | 3355(3)    | 2814(2)     | 37.6(9)   |
| C21  | 4218(4)    | 1055(3)    | 5059(2)     | 40.2(10)  |
| C46  | 8640(5)    | 411(3)     | 330(2)      | 42.0(10)  |
| C29  | 7181(4)    | 4580(3)    | 4921(2)     | 39.5(10)  |
| C10  | 5736(4)    | 1415(3)    | 2113(2)     | 42.6(10)  |

| Atom | x         | y         | z          | $U_{eq}$ |
|------|-----------|-----------|------------|----------|
| C52  | 11383(4)  | 5028(3)   | 1214(2)    | 37.7(9)  |
| C33  | 5217(4)   | 3538(3)   | 7293(2)    | 42.2(10) |
| C3   | 11121(9)  | 506(8)    | 1724(7)    | 36.2(6)  |
| C69  | 3502(4)   | 4491(3)   | 3078(2)    | 39.1(6)  |
| C27  | 4997(4)   | 3754(3)   | 4429(2)    | 39.5(9)  |
| C45  | 9738(4)   | 1109(3)   | 457(2)     | 40.7(9)  |
| C9   | 5657(4)   | 1434(3)   | 2823(2)    | 35.9(9)  |
| C39  | 9395(5)   | 1387(3)   | -2381(2)   | 45.1(10) |
| C11  | 6788(4)   | 1317(3)   | 1771(2)    | 44.2(10) |
| C41  | 9029(4)   | 2640(3)   | -2340(2)   | 38.9(9)  |
| C59  | 6718(4)   | 6042(3)   | 1172(2)    | 37.9(10) |
| C23  | 3593(4)   | -142(3)   | 3898(3)    | 48.1(12) |
| C57  | 7995(4)   | 6429(3)   | 2304(2)    | 42.0(10) |
| C51  | 11659(4)  | 4632(3)   | 514(3)     | 45.6(11) |
| C42  | 8797(4)   | 2832(3)   | -1617(2)   | 39.9(9)  |
| C36  | 6361(4)   | 2338(3)   | 6675(3)    | 49.4(12) |
| C35  | 6081(4)   | 2524(3)   | 7389(3)    | 48.2(12) |
| C22  | 3371(4)   | 276(3)    | 4613(3)    | 50.9(12) |
| C6   | 11266(7)  | 1930(5)   | 3029(4)    | 38.0(7)  |
| C72  | 3378(7)   | 3253(5)   | 1716(5)    | 37.8(7)  |
| C4   | 12221(7)  | 1322(5)   | 1947(4)    | 37.3(6)  |
| C70  | 2401(7)   | 3851(5)   | 2786(5)    | 39.3(7)  |
| C5   | 12267(6)  | 1991(5)   | 2607(4)    | 38.6(7)  |
| C71  | 2315(7)   | 3248(5)   | 2092(4)    | 39.0(7)  |
| C6A  | 11472(10) | 1780(7)   | 3177(6)    | 38.1(7)  |
| C5A  | 12505(9)  | 1767(7)   | 2795(6)    | 38.3(7)  |
| C4A  | 12378(10) | 1131(7)   | 2110(6)    | 37.7(6)  |
| C3A  | 11324(12) | 600(10)   | 1788(10)   | 36.3(6)  |
| C72A | 3394(9)   | 3458(6)   | 1556(6)    | 37.5(7)  |
| C71A | 2268(8)   | 3496(6)   | 1837(5)    | 38.9(7)  |
| C70A | 2304(9)   | 4050(6)   | 2565(6)    | 39.2(7)  |
| C13  | 8464(3)   | 106(2)    | 3399.9(19) | 25.3(5)  |
| C14  | 7470(7)   | -575(5)   | 3003(4)    | 26.0(6)  |
| C18  | 9315(6)   | 92(5)     | 3937(4)    | 25.5(6)  |
| C16  | 9071(7)   | -667(4)   | 4035(3)    | 25.9(6)  |
| C15  | 7259(6)   | -1342(4)  | 3103(4)    | 26.5(6)  |
| C17  | 8053(7)   | -1371(5)  | 3607(4)    | 25.9(6)  |
| C16A | 8540(11)  | -911(7)   | 3913(5)    | 26.1(6)  |
| C18A | 8970(9)   | -76(7)    | 3922(6)    | 25.5(6)  |
| C17A | 7649(9)   | -1544(6)  | 3354(6)    | 26.2(6)  |
| C15A | 7134(9)   | -1376(6)  | 2815(6)    | 26.4(6)  |
| C14A | 7507(10)  | -585(7)   | 2809(5)    | 25.9(6)  |
| C17A | 7809(14)  | -1350(30) | 831(15)    | 45.4(10) |

**Table S4.** Experimental bond lengths in Å for **1**.

| Atom | Atom | Length/Å   |
|------|------|------------|
| Br8  | Mn2  | 2.544(3)   |
| Br7  | Mn2  | 2.5359(19) |
| Br2  | Mn1  | 2.5438(13) |
| Br5  | Mn2  | 2.495(3)   |
| Br3  | Mn1  | 2.4960(12) |
| Br1  | Mn1  | 2.5134(11) |
| Br6  | Mn2  | 2.480(3)   |
| Br4  | Mn1  | 2.4723(11) |
| P3   | C43  | 1.786(3)   |

| Atom | Atom | Length/Å  |
|------|------|-----------|
| P3   | C49  | 1.787(3)  |
| P3   | C37  | 1.784(3)  |
| P2   | C7   | 1.790(3)  |
| P2   | C13  | 1.788(3)  |
| P2   | C1   | 1.785(3)  |
| P4   | C56  | 1.784(3)  |
| P4   | C67  | 1.790(3)  |
| P4   | C61  | 1.788(4)  |
| P1   | C20  | 1.788(4)  |
| P1   | C25  | 1.783(3)  |
| P1   | C31  | 1.791(4)  |
| O2   | C50  | 1.385(4)  |
| O2   | C55  | 1.386(3)  |
| O1   | C14  | 1.386(4)  |
| O1   | C19  | 1.391(4)  |
| C43  | C44  | 1.344(13) |
| C43  | C48  | 1.417(13) |
| C43  | C44A | 1.486(19) |
| C43  | C48A | 1.36(2)   |
| C56  | C55  | 1.389(4)  |
| C56  | C57  | 1.395(4)  |
| C20  | C19  | 1.388(5)  |
| C20  | C21  | 1.397(5)  |
| C7   | C8   | 1.369(10) |
| C7   | C12  | 1.431(11) |
| C7   | C12A | 1.30(2)   |
| C7   | C8A  | 1.50(2)   |
| C13  | C14  | 1.395(4)  |
| C13  | C18  | 1.399(5)  |
| C49  | C50  | 1.397(4)  |
| C49  | C54  | 1.394(5)  |
| C67  | C68  | 1.386(5)  |
| C67  | C72  | 1.397(4)  |
| C50  | C51  | 1.386(5)  |
| C14  | C15  | 1.385(5)  |
| C37  | C38  | 1.381(5)  |
| C37  | C42  | 1.380(5)  |
| C55  | C60  | 1.384(5)  |
| C1   | C2   | 1.376(5)  |
| C1   | C6   | 1.382(5)  |
| C25  | C26  | 1.335(9)  |
| C25  | C30  | 1.413(8)  |
| C25  | C26A | 1.497(14) |
| C25  | C30A | 1.391(13) |
| C68  | C69  | 1.393(5)  |
| C19  | C24  | 1.381(5)  |
| C44  | C45  | 1.401(12) |
| C48  | C47  | 1.377(10) |
| C51  | C52  | 1.380(5)  |
| C57  | C58  | 1.374(5)  |
| C21  | C22  | 1.391(6)  |
| C32  | C33  | 1.344(8)  |
| C32  | C31  | 1.393(5)  |
| C32  | C33A | 1.53(2)   |
| C58  | C59  | 1.378(5)  |
| C72  | C71  | 1.401(5)  |
| C59  | C60  | 1.385(5)  |



| Atom | Atom | Length/Å  |
|------|------|-----------|
| C8   | C9   | 1.398(9)  |
| C54  | C53  | 1.382(5)  |
| C18  | C17  | 1.383(5)  |
| C15  | C16  | 1.383(6)  |
| C26  | C27  | 1.398(9)  |
| C61  | C66  | 1.419(7)  |
| C61  | C66A | 1.411(15) |
| C61  | C62  | 1.394(5)  |
| C12  | C11  | 1.375(10) |
| C52  | C53  | 1.389(5)  |
| C46  | C47  | 1.398(8)  |
| C46  | C45  | 1.387(8)  |
| C38  | C39  | 1.384(5)  |
| C2   | C3   | 1.389(5)  |
| C24  | C23  | 1.391(5)  |
| C4   | C5   | 1.355(6)  |
| C4   | C3   | 1.376(6)  |
| C9   | C10  | 1.373(8)  |
| C33  | C34  | 1.455(8)  |
| C71  | C70  | 1.372(6)  |
| C42  | C41  | 1.389(5)  |
| C10  | C11  | 1.394(8)  |
| C5   | C6   | 1.382(5)  |
| C31  | C36  | 1.407(7)  |
| C31  | C36A | 1.474(19) |
| C39  | C40  | 1.372(6)  |
| C23  | C22  | 1.375(6)  |
| C70  | C69  | 1.371(6)  |
| C40  | C41  | 1.367(6)  |
| C17  | C16  | 1.382(6)  |
| C30  | C29  | 1.405(8)  |
| C63  | C64  | 1.366(8)  |
| C63  | C62  | 1.422(7)  |
| C28  | C29  | 1.374(9)  |
| C28  | C27  | 1.377(9)  |
| C34  | C35  | 1.394(7)  |
| C66  | C65  | 1.386(7)  |
| C36  | C35  | 1.383(7)  |
| C64  | C65  | 1.406(8)  |
| Br4A | Mn1A | 2.481(6)  |
| Mn1A | Br2A | 2.535(7)  |
| Mn1A | Br1A | 2.504(6)  |
| Mn1A | Br3A | 2.495(6)  |
| Br5A | Mn2A | 2.532(18) |
| Br6A | Mn2A | 2.41(2)   |
| Mn2A | Br8A | 2.527(14) |
| Mn2A | Br7A | 2.53(2)   |
| Br8B | Mn2B | 2.53(6)   |
| Br5B | Mn2B | 2.32(5)   |
| Mn2B | Br7B | 2.50(4)   |
| Mn2B | Br6B | 2.68(3)   |
| C26A | C27A | 1.387(16) |
| C27A | C28A | 1.396(14) |
| C28A | C29A | 1.323(15) |
| C29A | C30A | 1.428(15) |
| C44A | C45A | 1.34(2)   |
| C45A | C46A | 1.370(14) |

| Atom | Atom | Length/Å  |
|------|------|-----------|
| C46A | C47A | 1.361(14) |
| C47A | C48A | 1.433(17) |
| C12A | C11A | 1.48(3)   |
| C11A | C10A | 1.32(2)   |
| C10A | C9A  | 1.363(19) |
| C9A  | C8A  | 1.35(2)   |
| C66A | C65A | 1.398(19) |
| C65A | C64A | 1.432(19) |
| C64A | C63A | 1.37(2)   |
| C63A | C62  | 1.320(16) |
| C36A | C35A | 1.43(2)   |
| C35A | C34A | 1.35(2)   |
| C34A | C33A | 1.19(3)   |

**Table S5.** Experimental bond lengths in Å for **2**.

| Atom | Atom | Length/Å   |
|------|------|------------|
| Mn01 | Cl03 | 2.4045(10) |
| Mn01 | Cl5  | 2.3551(10) |
| Mn01 | Cl6  | 2.3939(10) |
| Mn01 | Cl7  | 2.3497(14) |
| Mn01 | Cl7A | 2.295(15)  |
| Mn02 | Cl2  | 2.4062(10) |
| Mn02 | Cl1  | 2.3778(10) |
| Mn02 | Cl4  | 2.3565(10) |
| Mn02 | Cl3  | 2.3422(11) |
| P1   | C7   | 1.787(4)   |
| P1   | C1   | 1.794(4)   |
| P1   | C13  | 1.776(4)   |
| P4   | C61  | 1.778(3)   |
| P4   | C55  | 1.784(3)   |
| P4   | C67  | 1.792(3)   |
| P3   | C43  | 1.783(4)   |
| P3   | C49  | 1.785(4)   |
| P3   | C37  | 1.787(3)   |
| P2   | C25  | 1.778(4)   |
| P2   | C31  | 1.789(3)   |
| P2   | C20  | 1.786(4)   |
| O2   | C54  | 1.390(4)   |
| O2   | C62  | 1.389(4)   |
| O1   | C19  | 1.386(4)   |
| O1   | C8   | 1.390(4)   |
| C54  | C49  | 1.399(4)   |
| C54  | C53  | 1.375(5)   |
| C19  | C20  | 1.397(5)   |
| C19  | C24  | 1.382(5)   |
| C25  | C26  | 1.399(5)   |
| C25  | C30  | 1.408(5)   |
| C61  | C62  | 1.390(4)   |
| C61  | C66  | 1.390(4)   |
| C43  | C44  | 1.396(5)   |
| C43  | C48  | 1.397(5)   |
| C55  | C56  | 1.379(5)   |
| C55  | C60  | 1.397(5)   |
| C67  | C68  | 1.395(5)   |
| C67  | C72  | 1.400(8)   |

| Atom | Atom | Length/Å  |
|------|------|-----------|
| C67  | C72A | 1.399(11) |
| C49  | C50  | 1.400(5)  |
| C7   | C8   | 1.393(5)  |
| C7   | C12  | 1.399(5)  |
| C8   | C9   | 1.385(5)  |
| C53  | C52  | 1.395(5)  |
| C44  | C45  | 1.377(6)  |
| C31  | C32  | 1.380(5)  |
| C31  | C36  | 1.374(5)  |
| C62  | C63  | 1.385(5)  |
| C20  | C21  | 1.411(5)  |
| C26  | C27  | 1.382(6)  |
| C37  | C38  | 1.382(5)  |
| C37  | C42  | 1.389(5)  |
| C30  | C29  | 1.395(6)  |
| C68  | C69  | 1.380(5)  |
| C1   | C2   | 1.393(5)  |
| C1   | C6   | 1.392(8)  |
| C1   | C6A  | 1.420(11) |
| C66  | C65  | 1.392(5)  |
| C34  | C33  | 1.368(6)  |
| C34  | C35  | 1.385(6)  |
| C56  | C57  | 1.383(5)  |
| C2   | C3   | 1.334(12) |
| C2   | C3A  | 1.447(15) |
| C48  | C47  | 1.398(5)  |
| C32  | C33  | 1.378(5)  |
| C50  | C51  | 1.385(6)  |
| C40  | C39  | 1.373(6)  |
| C40  | C41  | 1.388(6)  |
| C60  | C59  | 1.402(5)  |
| C12  | C11  | 1.383(5)  |
| C24  | C23  | 1.399(6)  |
| C47  | C46  | 1.383(6)  |
| C28  | C29  | 1.381(7)  |
| C28  | C27  | 1.395(6)  |
| C65  | C64  | 1.379(5)  |
| C63  | C64  | 1.394(5)  |
| C38  | C39  | 1.375(5)  |
| C58  | C59  | 1.375(6)  |
| C58  | C57  | 1.386(6)  |
| C21  | C22  | 1.374(6)  |
| C46  | C45  | 1.404(6)  |
| C10  | C9   | 1.397(5)  |
| C10  | C11  | 1.384(6)  |
| C52  | C51  | 1.384(6)  |
| C3   | C4   | 1.508(12) |
| C69  | C70  | 1.343(8)  |
| C69  | C70A | 1.476(11) |
| C41  | C42  | 1.385(6)  |
| C23  | C22  | 1.395(6)  |
| C36  | C35  | 1.385(6)  |
| C6   | C5   | 1.404(9)  |
| C72  | C71  | 1.405(10) |
| C4   | C5   | 1.390(10) |
| C70  | C71  | 1.371(10) |
| C6A  | C5A  | 1.384(13) |

| Atom | Atom | Length/Å  |
|------|------|-----------|
| C5A  | C4A  | 1.377(14) |
| C4A  | C3A  | 1.246(16) |
| C72A | C71A | 1.388(11) |
| C71A | C70A | 1.401(12) |
| C13  | C14  | 1.338(9)  |
| C13  | C18  | 1.433(8)  |
| C13  | C18A | 1.362(11) |
| C13  | C14A | 1.461(12) |
| C14  | C15  | 1.419(10) |
| C18  | C16  | 1.399(8)  |
| C16  | C17  | 1.385(8)  |
| C15  | C17  | 1.357(9)  |
| C16A | C18A | 1.426(12) |
| C16A | C17A | 1.364(13) |
| C17A | C15A | 1.378(12) |
| C15A | C14A | 1.364(14) |

**Table S6.** Cartesian coordinates of the **1**.

|    | x, Å   | y, Å   | z, Å   |
|----|--------|--------|--------|
| Br | 10.335 | 10.974 | 0.818  |
| Br | 10.267 | 14.512 | -0.984 |
| Br | 11.124 | 14.216 | 3.022  |
| Br | 7.205  | 13.615 | 1.649  |
| Mn | 9.633  | 13.389 | 1.2    |
| Br | 3.55   | 10.579 | 8.489  |
| Br | 2.548  | 7.394  | 6.285  |
| Br | 3.374  | 7.028  | 10.304 |
| Br | 6.475  | 7.775  | 7.754  |
| Mn | 4.056  | 8.11   | 8.14   |
| P  | 2.583  | 12.662 | 0.633  |
| P  | -1.004 | 11.574 | -3.037 |
| O  | 1.643  | 11.85  | -1.981 |
| C  | 3.151  | 14.256 | 0.06   |
| C  | 0.331  | 12.431 | -3.854 |
| C  | 3.28   | 11.348 | -0.357 |
| C  | -0.746 | 9.806  | -3.134 |
| C  | 2.767  | 11.118 | -1.636 |
| C  | 3.042  | 12.409 | 2.339  |
| C  | 1.578  | 12.416 | -3.245 |
| C  | -0.006 | 9.28   | -4.181 |
| H  | 0.433  | 9.854  | -4.796 |
| C  | 4.378  | 14.424 | -0.464 |
| H  | 4.95   | 13.676 | -0.584 |
| C  | 2.301  | 15.359 | 0.319  |
| H  | 1.458  | 15.236 | 0.742  |
| C  | 3.335  | 10.177 | -2.48  |
| H  | 2.979  | 10.025 | -3.348 |
| C  | 0.193  | 13.045 | -5.099 |
| H  | -0.661 | 13.09  | -5.516 |

|   |        |        |        |
|---|--------|--------|--------|
| C | 1.291  | 13.588 | -5.721 |
| H | 1.199  | 13.983 | -6.58  |
| C | -1.389 | 8.967  | -2.22  |
| H | -1.908 | 9.327  | -1.512 |
| C | 2.524  | 13.562 | -5.107 |
| H | 3.276  | 13.941 | -5.547 |
| C | 4.371  | 10.6   | 0.082  |
| H | 4.721  | 10.736 | 0.954  |
| C | 2.68   | 12.989 | -3.855 |
| H | 3.527  | 12.99  | -3.424 |
| C | -2.59  | 11.948 | -3.773 |
| C | 4.43   | 9.466  | -2.031 |
| H | 4.84   | 8.83   | -2.607 |
| C | 3.982  | 16.799 | -0.644 |
| H | 4.263  | 17.667 | -0.908 |
| C | 2.621  | 11.264 | 2.986  |
| H | 2.118  | 10.608 | 2.517  |
| C | 2.728  | 16.613 | -0.056 |
| H | 2.161  | 17.363 | 0.086  |
| C | -1.247 | 7.58   | -2.371 |
| H | -1.662 | 6.994  | -1.75  |
| C | 3.778  | 13.355 | 3.021  |
| H | 4.078  | 14.14  | 2.578  |
| C | 2.936  | 11.071 | 4.321  |
| H | 2.647  | 10.284 | 4.766  |
| C | -0.514 | 7.062  | -3.409 |
| H | -0.42  | 6.122  | -3.498 |
| C | 4.812  | 15.704 | -0.836 |
| H | 5.673  | 15.822 | -1.219 |
| C | 3.662  | 12.016 | 5.003  |
| H | 3.876  | 11.881 | 5.918  |
| C | 0.084  | 7.896  | -4.319 |
| H | 0.564  | 7.527  | -5.052 |
| C | 4.943  | 9.664  | -0.758 |
| H | 5.689  | 9.154  | -0.461 |
| C | 4.076  | 13.15  | 4.362  |
| H | 4.573  | 13.804 | 4.838  |
| C | -4.192 | 11.732 | -5.549 |
| H | -4.399 | 11.509 | -6.449 |
| C | -3.621 | 12.362 | -2.891 |
| H | -3.435 | 12.547 | -1.979 |
| C | -5.19  | 12.189 | -4.735 |
| H | -6.07  | 12.299 | -5.075 |
| C | -4.908 | 12.493 | -3.393 |
| H | -5.606 | 12.789 | -2.821 |
| C | -2.853 | 11.583 | -5.094 |
| H | -2.169 | 11.25  | -5.662 |

|   |        |        |        |
|---|--------|--------|--------|
| H | 1.197  | 12.623 | 0.576  |
| H | -1.107 | 11.937 | -1.838 |
| P | -0.041 | 9.336  | 8.705  |
| P | 3.549  | 10.147 | 12.476 |
| O | 0.891  | 10.161 | 11.334 |
| C | 2.063  | 9.59   | 13.3   |
| C | -0.717 | 7.818  | 9.37   |
| C | -0.617 | 10.758 | 9.621  |
| C | -0.13  | 10.995 | 10.906 |
| C | -0.529 | 9.541  | 7.001  |
| C | 3.591  | 11.923 | 12.325 |
| C | 0.846  | 9.691  | 12.642 |
| C | 2.086  | 9.061  | 14.593 |
| H | 2.911  | 8.97   | 15.056 |
| C | 5.304  | 10.247 | 14.605 |
| H | 4.799  | 11.009 | 14.867 |
| C | -0.132 | 6.607  | 9.118  |
| H | 0.68   | 6.57   | 8.626  |
| C | -1.578 | 11.622 | 9.086  |
| H | -1.894 | 11.493 | 8.2    |
| C | -0.622 | 12.035 | 11.678 |
| H | -0.298 | 12.183 | 12.559 |
| C | 2.87   | 12.767 | 13.067 |
| H | 2.243  | 12.432 | 13.698 |
| C | -1.954 | 7.877  | 10.087 |
| H | -2.365 | 8.712  | 10.278 |
| C | -1.591 | 8.835  | 6.486  |
| H | -2.055 | 8.209  | 7.03   |
| C | -0.333 | 9.288  | 13.24  |
| H | -1.157 | 9.355  | 12.773 |
| C | -1.307 | 9.935  | 4.379  |
| H | -1.558 | 10.051 | 3.47   |
| C | -0.717 | 5.424  | 9.58   |
| H | -0.289 | 4.589  | 9.429  |
| C | 6.317  | 9.841  | 15.388 |
| H | 6.548  | 10.318 | 16.177 |
| C | -1.911 | 5.476  | 10.254 |
| H | -2.316 | 4.673  | 10.557 |
| C | -0.283 | 10.656 | 4.895  |
| H | 0.158  | 11.303 | 4.355  |
| C | 4.966  | 9.595  | 13.422 |
| C | -0.297 | 8.779  | 14.534 |
| H | -1.103 | 8.507  | 14.959 |
| C | 0.899  | 8.667  | 15.201 |
| H | 0.916  | 8.319  | 16.085 |
| C | -2.069 | 12.667 | 9.851  |
| H | -2.727 | 13.251 | 9.494  |

|    |        |        |        |
|----|--------|--------|--------|
| C  | 0.126  | 10.459 | 6.2    |
| H  | 0.859  | 10.953 | 6.547  |
| C  | -2.534 | 6.699  | 10.495 |
| H  | -3.371 | 6.72   | 10.947 |
| C  | -1.986 | 9.037  | 5.17   |
| H  | -2.724 | 8.555  | 4.815  |
| C  | 4.535  | 12.352 | 11.363 |
| H  | 5.046  | 11.737 | 10.85  |
| C  | -1.596 | 12.854 | 11.136 |
| H  | -1.95  | 13.564 | 11.66  |
| C  | 3.938  | 14.621 | 11.977 |
| H  | 4.05   | 15.557 | 11.861 |
| C  | 4.668  | 13.743 | 11.214 |
| H  | 5.277  | 14.083 | 10.569 |
| C  | 3.044  | 14.146 | 12.911 |
| H  | 2.549  | 14.752 | 13.449 |
| C  | 7.048  | 8.647  | 14.993 |
| H  | 7.765  | 8.33   | 15.529 |
| C  | 5.66   | 8.432  | 13.038 |
| H  | 5.418  | 7.97   | 12.243 |
| C  | 6.697  | 7.97   | 13.827 |
| H  | 7.172  | 7.187  | 13.573 |
| H  | 1.266  | 9.331  | 8.802  |
| H  | 3.643  | 9.635  | 11.309 |
| H  | 4.824  | 10.987 | 14.961 |
| Br | 6.747  | 8.235  | 7.671  |
| Mn | 4.32   | 8.458  | 8.135  |
| Br | 3.672  | 10.882 | 8.497  |
| Br | 3.697  | 7.323  | 10.278 |
| Br | 2.83   | 7.623  | 6.315  |
| Br | 11.411 | 14.453 | 3.003  |
| Br | 7.457  | 14.013 | 1.554  |
| Mn | 9.815  | 13.714 | 1.181  |
| Br | 10.395 | 11.279 | 0.824  |
| Br | 10.392 | 14.818 | -1.021 |
| Br | 10.556 | 11.173 | 0.752  |
| Br | 11.152 | 14.507 | 2.925  |
| Mn | 9.979  | 13.616 | 1.131  |
| Br | 10.7   | 14.805 | -0.951 |
| Br | 7.313  | 13.559 | 1.346  |
| C  | 2.831  | 12.65  | 13.39  |
| H  | 2.353  | 12.168 | 14.054 |
| C  | 2.835  | 14.038 | 13.4   |
| H  | 2.354  | 14.513 | 14.066 |
| C  | 3.55   | 14.73  | 12.419 |
| H  | 3.531  | 15.679 | 12.438 |
| C  | 4.252  | 14.136 | 11.468 |

|   |        |        |        |
|---|--------|--------|--------|
| H | 4.729  | 14.654 | 10.83  |
| C | 4.285  | 12.71  | 11.413 |
| H | 4.796  | 12.287 | 10.732 |
| C | 4.474  | 14.26  | -0.618 |
| H | 4.935  | 13.444 | -0.775 |
| C | 5.009  | 15.422 | -1.006 |
| H | 5.86   | 15.433 | -1.43  |
| C | 4.338  | 16.598 | -0.8   |
| H | 4.753  | 17.411 | -1.066 |
| C | 3.103  | 16.655 | -0.23  |
| H | 2.656  | 17.486 | -0.128 |
| C | 2.49   | 15.437 | 0.214  |
| H | 1.628  | 15.455 | 0.612  |
| C | -1.889 | 7.695  | 9.916  |
| H | -2.454 | 8.451  | 10.038 |
| C | -2.322 | 6.35   | 10.339 |
| H | -3.145 | 6.217  | 10.794 |
| C | -1.517 | 5.337  | 10.063 |
| H | -1.811 | 4.469  | 10.319 |
| C | -0.315 | 5.438  | 9.441  |
| H | 0.193  | 4.654  | 9.263  |
| C | 0.169  | 6.649  | 9.075  |
| H | 1.015  | 6.75   | 8.655  |
| C | -3.477 | 12.927 | -3.277 |
| H | -3.264 | 13.38  | -2.47  |
| C | -4.662 | 13.243 | -3.948 |
| H | -5.337 | 13.763 | -3.527 |
| C | -4.828 | 12.762 | -5.287 |
| H | -5.603 | 12.995 | -5.783 |
| C | -3.866 | 11.965 | -5.847 |
| H | -3.928 | 11.694 | -6.756 |
| H | -2.23  | 10.991 | -5.497 |
| C | 6.059  | 8.973  | 12.651 |
| H | 6.019  | 8.843  | 11.711 |
| C | 7.186  | 8.583  | 13.444 |
| H | 7.747  | 7.874  | 13.155 |
| C | 7.453  | 9.226  | 14.605 |
| H | 8.349  | 9.356  | 14.892 |
| C | 6.539  | 9.63   | 15.258 |
| H | 6.582  | 9.565  | 16.205 |

**Table S7.** Cartesian coordinates of the **2**.

|    | x, Å  | y, Å   | z, Å   |
|----|-------|--------|--------|
| Mn | 7.283 | -3.691 | 1.184  |
| Cl | 6.6   | -5.96  | 0.775  |
| Cl | 5.83  | -2.996 | 2.902  |
| Cl | 6.752 | -2.615 | -0.887 |
| Cl | 9.586 | -3.519 | 1.619  |



|    |        |        |        |
|----|--------|--------|--------|
| Mn | 9.882  | 1.178  | 10.194 |
| Cl | 9.294  | -1.126 | 9.825  |
| Cl | 9.297  | 2.211  | 8.133  |
| Cl | 8.433  | 1.848  | 11.927 |
| Cl | 12.17  | 1.466  | 10.605 |
| P  | 9.333  | -0.733 | 6.019  |
| P  | 5.708  | 0.014  | 9.697  |
| O  | 6.627  | -0.72  | 7.045  |
| C  | 5.571  | -1.539 | 7.415  |
| C  | 5.147  | 1.585  | 9.081  |
| C  | 7.893  | -0.142 | 5.139  |
| C  | 6.642  | -0.23  | 5.744  |
| C  | 5.17   | -0.236 | 11.385 |
| C  | 5.079  | -1.331 | 8.706  |
| C  | 3.912  | 1.701  | 8.434  |
| H  | 3.383  | 0.929  | 8.268  |
| C  | 5.919  | 2.731  | 9.351  |
| H  | 6.747  | 2.658  | 9.809  |
| C  | 10.797 | -0.228 | 5.112  |
| C  | 4.351  | -0.679 | 13.99  |
| H  | 4.089  | -0.807 | 14.894 |
| C  | 11.092 | -0.859 | 3.906  |
| H  | 10.543 | -1.582 | 3.626  |
| C  | 4.171  | 0.541  | 11.934 |
| H  | 3.751  | 1.221  | 11.418 |
| C  | 7.972  | 0.415  | 3.859  |
| H  | 8.816  | 0.486  | 3.427  |
| C  | 5.061  | -2.514 | 6.579  |
| H  | 5.397  | -2.633 | 5.698  |
| C  | 4.231  | 4.091  | 8.294  |
| H  | 3.911  | 4.944  | 8.027  |
| C  | 4.061  | -2.183 | 9.184  |
| H  | 3.73   | -2.075 | 10.066 |
| C  | 5.45   | 3.979  | 8.933  |
| H  | 5.973  | 4.756  | 9.091  |
| C  | 5.601  | 0.761  | 3.836  |
| H  | 4.82   | 1.052  | 3.381  |
| C  | 3.792  | 0.317  | 13.239 |
| H  | 3.124  | 0.871  | 13.628 |
| C  | 12.112 | -0.492 | 3.13   |
| H  | 12.339 | -0.985 | 2.349  |
| C  | 3.469  | 2.949  | 8.04   |
| H  | 2.636  | 3.031  | 7.591  |
| C  | 5.493  | 0.234  | 5.125  |
| H  | 4.652  | 0.193  | 5.566  |
| C  | 6.834  | 0.863  | 3.215  |
| H  | 6.897  | 1.242  | 2.346  |

|   |        |        |        |
|---|--------|--------|--------|
| C | 4.032  | -3.322 | 7.076  |
| H | 3.653  | -3.987 | 6.514  |
| C | 5.731  | -1.255 | 12.117 |
| H | 6.413  | -1.794 | 11.733 |
| C | 5.307  | -1.5   | 13.413 |
| H | 5.67   | -2.227 | 13.904 |
| C | 3.547  | -3.168 | 8.374  |
| H | 2.864  | -3.744 | 8.699  |
| C | 11.48  | 0.923  | 5.498  |
| H | 11.21  | 1.405  | 6.272  |
| C | 12.892 | 0.733  | 3.534  |
| H | 13.589 | 1.069  | 2.983  |
| C | 12.57  | 1.361  | 4.732  |
| H | 13.094 | 2.093  | 5.035  |
| C | 9.341  | -2.502 | 6.172  |
| C | 8.608  | -3.358 | 5.451  |
| H | 7.972  | -3.036 | 4.823  |
| C | 10.291 | -2.95  | 7.147  |
| H | 10.807 | -2.334 | 7.652  |
| C | 10.43  | -4.331 | 7.325  |
| H | 11.034 | -4.669 | 7.975  |
| C | 8.789  | -4.754 | 5.633  |
| H | 8.286  | -5.373 | 5.115  |
| C | 9.684  | -5.202 | 6.548  |
| H | 9.802  | -6.138 | 6.661  |
| H | 9.46   | -0.114 | 7.17   |
| H | 7.1    | -0.026 | 9.694  |
| P | 4.471  | 5.49   | 2.937  |
| P | 8.122  | 4.632  | -0.653 |
| O | 7.162  | 5.295  | 1.98   |
| C | 8.294  | 6.053  | 1.699  |
| C | 5.792  | 4.668  | 3.797  |
| C | 8.611  | 3.002  | -0.123 |
| C | 4.697  | 7.259  | 2.991  |
| C | 2.898  | 5.103  | 3.703  |
| C | 8.826  | 5.875  | 0.418  |
| C | 8.844  | 6.926  | 2.609  |
| H | 8.484  | 7.015  | 3.482  |
| C | 9.866  | 2.811  | 0.457  |
| H | 10.447 | 3.55   | 0.593  |
| C | 7.063  | 4.705  | 3.234  |
| C | 8.66   | 4.945  | -2.328 |
| C | 2.642  | 5.537  | 5.005  |
| H | 3.311  | 6.009  | 5.488  |
| C | 5.629  | 4.035  | 5.023  |
| H | 4.764  | 3.98   | 5.412  |
| C | 5.335  | 7.843  | 4.064  |

|   |        |        |        |
|---|--------|--------|--------|
| H | 5.741  | 7.296  | 4.727  |
| C | 7.762  | 1.92   | -0.367 |
| H | 6.917  | 2.05   | -0.781 |
| C | 9.923  | 6.656  | 0.034  |
| H | 10.282 | 6.576  | -0.842 |
| C | 9.394  | 5.426  | -4.95  |
| H | 9.63   | 5.576  | -5.858 |
| C | 4.097  | 8.055  | 2.013  |
| H | 3.634  | 7.66   | 1.283  |
| C | 8.178  | 0.639  | 0.011  |
| H | 7.607  | -0.105 | -0.139 |
| C | 6.718  | 3.481  | 5.689  |
| H | 6.602  | 3.067  | 6.536  |
| C | 8.155  | 4.129  | 3.859  |
| H | 9.011  | 4.134  | 3.448  |
| C | 9.403  | 4.008  | -3.021 |
| H | 9.662  | 3.196  | -2.6   |
| C | 4.823  | 10.021 | 3.206  |
| H | 4.872  | 10.968 | 3.279  |
| C | 7.968  | 3.539  | 5.108  |
| H | 8.714  | 3.171  | 5.568  |
| C | 9.415  | 0.445  | 0.599  |
| H | 9.693  | -0.428 | 0.847  |
| C | 9.949  | 7.675  | 2.204  |
| H | 10.344 | 8.287  | 2.815  |
| C | 1.418  | 5.282  | 5.587  |
| H | 1.189  | 5.734  | 6.392  |
| C | 10.258 | 1.544  | 0.83   |
| H | 11.102 | 1.413  | 1.246  |
| C | 9.764  | 4.262  | -4.322 |
| H | 10.279 | 3.62   | -4.797 |
| C | 8.673  | 6.381  | -4.248 |
| H | 8.434  | 7.2    | -4.666 |
| C | 4.19   | 9.45   | 2.128  |
| H | 3.813  | 10.003 | 1.454  |
| C | 5.388  | 9.221  | 4.182  |
| H | 5.813  | 9.616  | 4.935  |
| C | 10.482 | 7.548  | 0.933  |
| H | 11.232 | 8.072  | 0.679  |
| C | 8.299  | 6.14   | -2.935 |
| H | 7.798  | 6.789  | -2.454 |
| C | 1.974  | 4.231  | 3.115  |
| H | 2.15   | 3.849  | 2.263  |
| C | 0.542  | 4.413  | 5.057  |
| H | -0.229 | 4.145  | 5.542  |
| C | 0.785  | 3.926  | 3.798  |
| H | 0.136  | 3.37   | 3.381  |

|    |        |        |        |
|----|--------|--------|--------|
| H  | 4.363  | 5.168  | 1.779  |
| H  | 6.675  | 4.697  | -0.654 |
| H  | 10.55  | -1.551 | 3.546  |
| H  | 1.286  | 5.33   | 6.528  |
| C  | 11.789 | 0.548  | 5.767  |
| H  | 11.657 | 0.868  | 6.651  |
| C  | 12.955 | 0.827  | 5.074  |
| H  | 13.609 | 1.399  | 5.458  |
| C  | 13.169 | 0.276  | 3.83   |
| H  | 14.012 | 0.4    | 3.408  |
| C  | 12.287 | -0.381 | 3.246  |
| H  | 12.405 | -0.579 | 2.323  |
| C  | 1.882  | 4.709  | 2.825  |
| H  | 2.064  | 4.555  | 1.905  |
| C  | 0.601  | 4.553  | 3.335  |
| H  | -0.088 | 4.19   | 2.791  |
| C  | 0.329  | 4.929  | 4.656  |
| H  | -0.571 | 4.958  | 4.958  |
| C  | 9.972  | -4.654 | 7.103  |
| H  | 10.399 | -5.148 | 7.793  |
| C  | 9.997  | -3.227 | 7.12   |
| H  | 10.48  | -2.776 | 7.801  |
| C  | 9.331  | -5.299 | 6.088  |
| H  | 9.337  | -6.248 | 6.056  |
| C  | 8.672  | -4.585 | 5.11   |
| H  | 8.216  | -5.058 | 4.422  |
| C  | 8.658  | -3.222 | 5.099  |
| H  | 8.21   | -2.749 | 4.408  |
| Cl | 9.439  | -2.974 | 1.509  |

**Table S8.** Cartesian coordinates of the DFT optimized structure **1**.

|    | x, Å   | y, Å   | z, Å   |
|----|--------|--------|--------|
| P  | 0.078  | 9.187  | 8.644  |
| P  | 3.52   | 10.157 | 12.327 |
| O  | 0.918  | 10.032 | 11.231 |
| Mn | 3.938  | 7.873  | 8.719  |
| Br | 3.507  | 10.461 | 8.684  |
| Br | 2.389  | 7.015  | 6.989  |
| Br | 2.815  | 7.178  | 10.882 |
| Br | 6.332  | 7.538  | 8.903  |
| H  | 3.131  | 8.761  | 14.94  |
| H  | 4.908  | 10.938 | 14.768 |
| H  | 0.64   | 6.375  | 9.074  |
| H  | -1.562 | 11.525 | 7.783  |
| H  | -0.01  | 12.24  | 12.481 |
| H  | 2.219  | 11.836 | 14.378 |
| H  | -2.516 | 9.201  | 9.966  |
| H  | -2.273 | 8.471  | 7.076  |
| H  | -1.27  | 9.256  | 12.614 |
| H  | -1.126 | 9.852  | 3.151  |
| H  | -0.641 | 4.592  | 10.258 |

|   |        |        |        |
|---|--------|--------|--------|
| H | 7.024  | 10.118 | 15.799 |
| H | -2.863 | 5.102  | 11.264 |
| H | 1.1    | 10.537 | 4.037  |
| H | -1.166 | 8.279  | 14.924 |
| H | 1.027  | 8.012  | 16.072 |
| H | -2.292 | 13.561 | 9.042  |
| H | 1.648  | 10.188 | 6.45   |
| H | -3.812 | 7.402  | 11.107 |
| H | -2.812 | 8.813  | 4.661  |
| H | 4.403  | 12.347 | 10.68  |
| H | -1.531 | 13.907 | 11.389 |
| H | 2.988  | 15.8   | 12.852 |
| H | 4.188  | 14.818 | 10.901 |
| H | 2.006  | 14.312 | 14.595 |
| H | 8.371  | 8.367  | 14.645 |
| H | 5.481  | 8.19   | 11.452 |
| H | 7.598  | 7.429  | 12.457 |
| H | 1.465  | 8.989  | 8.836  |
| H | 3.52   | 9.953  | 10.907 |
| C | 2.095  | 9.456  | 13.181 |
| C | -0.871 | 7.886  | 9.445  |
| C | -0.414 | 10.742 | 9.431  |
| C | 0.013  | 10.96  | 10.75  |
| C | -0.297 | 9.341  | 6.897  |
| C | 3.353  | 11.947 | 12.536 |
| C | 0.855  | 9.588  | 12.543 |
| C | 2.161  | 8.884  | 14.456 |
| C | 5.487  | 10.148 | 14.285 |
| C | -0.333 | 6.59   | 9.519  |
| C | -1.242 | 11.688 | 8.813  |
| C | -0.382 | 12.088 | 11.467 |
| C | 2.664  | 12.495 | 13.63  |
| C | -2.12  | 8.185  | 10.018 |
| C | -1.549 | 8.942  | 6.409  |
| C | -0.325 | 9.175  | 13.153 |
| C | -0.895 | 9.712  | 4.209  |
| C | -1.06  | 5.596  | 10.181 |
| C | 6.677  | 9.694  | 14.855 |
| C | -2.305 | 5.886  | 10.749 |
| C | 0.356  | 10.102 | 4.705  |
| C | 5.052  | 9.592  | 13.068 |
| C | -0.251 | 8.618  | 14.435 |
| C | 0.982  | 8.466  | 15.082 |
| C | -1.647 | 12.824 | 9.521  |
| C | 0.667  | 9.917  | 6.053  |
| C | -2.839 | 7.178  | 10.665 |
| C | -1.845 | 9.13   | 5.055  |
| C | 3.904  | 12.782 | 11.549 |
| C | -1.221 | 13.016 | 10.842 |
| C | 3.091  | 14.717 | 12.764 |
| C | 3.769  | 14.168 | 11.67  |
| C | 2.538  | 13.883 | 13.744 |
| C | 7.434  | 8.71   | 14.202 |
| C | 5.806  | 8.609  | 12.407 |
| C | 7.004  | 8.178  | 12.982 |

**Table S9.** Cartesian coordinates of the DFT optimized structure **2**.

|    | x, Å   | y, Å   | z, Å   |
|----|--------|--------|--------|
| P  | 9.317  | -0.774 | 6.182  |
| P  | 5.895  | 0.17   | 9.767  |
| O  | 6.675  | -0.668 | 7.174  |
| Mn | 9.728  | 1.395  | 9.712  |
| Cl | 9.25   | -1.047 | 9.697  |
| Cl | 8.707  | 2.04   | 7.641  |
| Cl | 8.222  | 2.154  | 11.339 |
| Cl | 11.986 | 1.703  | 9.594  |
| H  | 3.327  | 0.383  | 8.422  |
| H  | 6.674  | 2.952  | 9.397  |
| H  | 4.659  | -0.587 | 15.238 |
| H  | 10.751 | -1.567 | 3.775  |
| H  | 3.517  | 0.841  | 11.329 |
| H  | 9.043  | 0.72   | 3.611  |
| H  | 5.564  | -2.74  | 5.838  |
| H  | 3.283  | 4.525  | 7.224  |
| H  | 4.031  | -2.043 | 10.546 |
| H  | 5.531  | 4.849  | 8.253  |
| H  | 4.754  | 1.238  | 3.464  |
| H  | 2.968  | 0.451  | 13.734 |
| H  | 12.881 | -0.754 | 2.773  |
| H  | 2.172  | 2.294  | 7.322  |
| H  | 4.546  | 0.186  | 5.731  |
| H  | 6.994  | 1.523  | 2.415  |
| H  | 3.892  | -4.303 | 6.864  |
| H  | 7.462  | -0.823 | 11.955 |
| H  | 6.902  | -1.222 | 14.359 |
| H  | 3.138  | -3.965 | 9.214  |
| H  | 11.276 | 1.188  | 7.092  |
| H  | 14.215 | 0.998  | 3.942  |
| H  | 13.413 | 1.942  | 6.115  |
| H  | 8.245  | -2.362 | 3.932  |
| H  | 9.885  | -3.027 | 7.878  |
| H  | 9.623  | -5.488 | 7.564  |
| H  | 7.996  | -4.824 | 3.618  |
| H  | 8.68   | -6.384 | 5.438  |
| H  | 9.284  | -0.625 | 7.61   |
| H  | 7.302  | 0.199  | 9.595  |
| C  | 5.685  | -1.527 | 7.614  |
| C  | 5.062  | 1.563  | 8.984  |
| C  | 7.931  | -0.023 | 5.301  |
| C  | 6.665  | -0.163 | 5.883  |
| C  | 5.505  | -0.004 | 11.508 |
| C  | 5.263  | -1.314 | 8.935  |
| C  | 3.798  | 1.368  | 8.398  |
| C  | 5.691  | 2.818  | 8.943  |
| C  | 10.872 | -0.22  | 5.476  |
| C  | 4.895  | -0.427 | 14.185 |
| C  | 11.324 | -0.778 | 4.266  |
| C  | 4.244  | 0.37   | 11.994 |
| C  | 8.053  | 0.591  | 4.05   |
| C  | 5.201  | -2.592 | 6.856  |
| C  | 3.781  | 3.691  | 7.723  |
| C  | 4.349  | -2.202 | 9.515  |

|   |        |        |        |
|---|--------|--------|--------|
| C | 5.04   | 3.876  | 8.303  |
| C | 5.645  | 0.878  | 3.979  |
| C | 3.941  | 0.155  | 13.341 |
| C | 12.523 | -0.328 | 3.712  |
| C | 3.155  | 2.439  | 7.773  |
| C | 5.514  | 0.281  | 5.239  |
| C | 6.905  | 1.039  | 3.389  |
| C | 4.274  | -3.46  | 7.442  |
| C | 6.473  | -0.576 | 12.349 |
| C | 6.155  | -0.789 | 13.692 |
| C | 3.852  | -3.273 | 8.765  |
| C | 11.618 | 0.764  | 6.145  |
| C | 13.272 | 0.656  | 4.373  |
| C | 12.825 | 1.191  | 5.585  |
| C | 9.116  | -2.554 | 5.907  |
| C | 8.567  | -3.053 | 4.714  |
| C | 9.496  | -3.429 | 6.939  |
| C | 9.336  | -4.806 | 6.762  |
| C | 8.417  | -4.432 | 4.546  |
| C | 8.802  | -5.307 | 5.569  |

**Table S10.** Calculated zero-field splitting parameters.<sup>a</sup>

|                                                                           | <b>1</b> | <b>2</b> |
|---------------------------------------------------------------------------|----------|----------|
| $D_{tot}$ [MHz]                                                           | 4800     | 2007     |
| $E_{tot}$ [MHz]                                                           | 525      | 356      |
| $D_{SS}$ [MHz] <sup>b</sup>                                               | 443      | 481      |
| $E_{SS}$ [MHz] <sup>b</sup>                                               | 52       | 63       |
| $D_{SOC}$ [MHz] <sup>c</sup>                                              | 4368     | 1531     |
| $E_{SOC}$ [MHz] <sup>c</sup>                                              | 485      | 296      |
| $D_{\alpha \rightarrow \beta}$ [MHz] <sup>d</sup>                         | 8068     | 651      |
| $E_{\alpha \rightarrow \beta}$ [MHz] <sup>d</sup>                         | 790      | 129      |
| $D_{\alpha \rightarrow \alpha}/D_{\alpha \rightarrow \beta}$ <sup>d</sup> | 0.18     | 0.87     |
| $E_{\alpha \rightarrow \alpha}/E_{\alpha \rightarrow \beta}$ <sup>d</sup> | 0.05     | 0.60     |
| $D_{\beta \rightarrow \beta}/D_{\alpha \rightarrow \beta}$ <sup>d</sup>   | 0.19     | 1.3      |
| $E_{\beta \rightarrow \beta}/E_{\alpha \rightarrow \beta}$ <sup>d</sup>   | 0.31     | 0.83     |
| $D_{\beta \rightarrow \alpha}/D_{\alpha \rightarrow \beta}$ <sup>d</sup>  | -0.83    | -0.85    |
| $E_{\beta \rightarrow \alpha}/E_{\alpha \rightarrow \beta}$ <sup>d</sup>  | -0.61    | -0.17    |

**Table S11.** Energy of transitions for polycrystalline complexes **1** and **2**.

|                                                           | <b>1</b> | <b>2</b> |
|-----------------------------------------------------------|----------|----------|
| ${}^6A_1 \rightarrow {}^4T_1$ [cm <sup>-1</sup> ]         | 20700    | 20790    |
| ${}^6A_1 \rightarrow {}^4T_2$ [cm <sup>-1</sup> ]         | 22230    | 22470    |
| ${}^6A_1 \rightarrow {}^4A_1/{}^4E_1$ [cm <sup>-1</sup> ] | 22730    | 23040    |
| $\Delta({}^4T_2 - {}^4T_1)$ [cm <sup>-1</sup> ]           | 1530     | 1680     |

**Table S12.** Calculated spin-flip transition energies of **1** and **2**.

| <b>1</b>   |                               |                               | <b>2</b> |                               |                               |
|------------|-------------------------------|-------------------------------|----------|-------------------------------|-------------------------------|
| Functional | BP86                          | B3LYP                         |          | BP86                          | B3LYP                         |
| №          | $\Delta E$ , cm <sup>-1</sup> | $\Delta E$ , cm <sup>-1</sup> | №        | $\Delta E$ , cm <sup>-1</sup> | $\Delta E$ , cm <sup>-1</sup> |
| 1          | 2789                          | 903                           | 1        | 2831                          | 914                           |
| 2          | 19194                         | 19858                         | 2        | 19867                         | 20104                         |
| 3          | 19505                         | 19966                         | 3        | 20299                         | 20127                         |
| 4          | 20060                         | 20529                         | 4        | 20869                         | 20850                         |
| 5          | 20269                         | 20590                         | 5        | 21201                         | 20869                         |
| 6          | 20439                         | 20651                         | 6        | 21255                         | 20984                         |
| 7          | 20516                         | 20905                         | 7        | 21379                         | 21076                         |
| 8          | 20599                         | 21027                         | 8        | 21487                         | 21371                         |
| 9          | 20854                         | 21368                         | 9        | 21588                         | 21725                         |
| 10         | 20975                         | 21502                         | 10       | 21678                         | 21861                         |
| 11         | 21005                         | 21660                         | 11       | 21727                         | 21950                         |
| 12         | 21170                         | 21770                         | 12       | 22111                         | 22075                         |
| 13         | 21903                         | 21943                         | 13       | 22697                         | 22302                         |
| 14         | 22609                         | 22870                         | 14       | 23347                         | 23160                         |
| 15         | 22622                         | 22943                         | 15       | 23378                         | 23217                         |
| 16         | 25504                         | 27967                         | 16       | 27139                         | 28702                         |
| 17         | 25961                         | 28444                         | 17       | 27495                         | 29238                         |
| 18         | 26123                         | 28806                         | 18       | 27840                         | 29793                         |
| 19         | 27912                         | 29640                         | 19       | 29632                         | 30410                         |
| 20         | 27935                         | 30267                         | 20       | 29864                         | 31116                         |
| 21         | 27983                         | 30638                         | 21       | 29907                         | 31605                         |
| 22         | 28232                         | 31249                         | 22       | 30086                         | 32191                         |
| 23         | 28239                         | 31345                         | 23       | 30171                         | 32309                         |
| 24         | 28393                         | 31597                         | 24       | 30312                         | 32331                         |
| 25         | 28714                         | 31781                         | 25       | 30630                         | 32757                         |

**Table S13.** Calculated UVVis transition energies of [H<sub>2</sub>DPEphos][ZnBr<sub>4</sub>] and [H<sub>2</sub>DPEphos][ZnCl<sub>4</sub>].

|                                 | [H <sub>2</sub> DPEphos][ZnBr <sub>4</sub> ] |                  |       |        |                  |       |           |                  |       |
|---------------------------------|----------------------------------------------|------------------|-------|--------|------------------|-------|-----------|------------------|-------|
| Functional                      | BP86                                         |                  |       | B3LYP  |                  |       | CAM-B3LYP |                  |       |
| Unit                            | eV                                           | cm <sup>-1</sup> | nm    | eV     | cm <sup>-1</sup> | nm    | eV        | cm <sup>-1</sup> | nm    |
| $\Delta E(^1\pi\pi)$            | 4.1329                                       | 33334            | 300.0 | 4.5849 | 36980            | 270.4 | 4.5949    | 37060            | 269.8 |
| $\Delta E(^3\pi\pi)$            | 3.2007                                       | 25815            | 387.4 | 3.6347 | 29316            | 341.1 | 3.2327    | 26073            | 383.5 |
| $\Delta E(^1\pi\pi - ^3\pi\pi)$ | 0.9322                                       | 7519             | -     | 0.9502 | 7664             | -     | 1.3622    | 10987            | -     |

|                                 | [H <sub>2</sub> DPEphos][ZnCl <sub>4</sub> ] |                  |       |        |                  |       |           |                  |       |
|---------------------------------|----------------------------------------------|------------------|-------|--------|------------------|-------|-----------|------------------|-------|
| Functional                      | BP86                                         |                  |       | B3LYP  |                  |       | CAM-B3LYP |                  |       |
| Unit                            | eV                                           | cm <sup>-1</sup> | nm    | eV     | cm <sup>-1</sup> | nm    | eV        | cm <sup>-1</sup> | nm    |
| $\Delta E(^1\pi\pi)$            | 4.3743                                       | 35281            | 283.4 | 4.4842 | 36168            | 276.5 | 4.4648    | 36011            | 277.7 |
| $\Delta E(^3\pi\pi)$            | 3.3454                                       | 26982            | 370.6 | 3.4612 | 27916            | 358.2 | 3.3086    | 26686            | 374.7 |
| $\Delta E(^1\pi\pi - ^3\pi\pi)$ | 1.0289                                       | 8299             | -     | 1.0230 | 8251             | -     | 1.1562    | 9325             | -     |



**Table S14.** Calculated UVVis transition energies of  $[\text{H}_2\text{DPEphos}]^{2+}$  with different geometries.

|                                 | $[\text{H}_2\text{DPEphos}]^{2+}$           |                  |       |                                             |                  |       |
|---------------------------------|---------------------------------------------|------------------|-------|---------------------------------------------|------------------|-------|
| Geometry from                   | $[\text{H}_2\text{DPEphos}][\text{ZnBr}_4]$ |                  |       | $[\text{H}_2\text{DPEphos}][\text{ZnCl}_4]$ |                  |       |
| Functional                      | CAM-B3LYP                                   |                  |       | CAM-B3LYP                                   |                  |       |
| Unit                            | eV                                          | $\text{cm}^{-1}$ | nm    | eV                                          | $\text{cm}^{-1}$ | nm    |
| $\Delta E(^1\pi\pi)$            | 4.6448                                      | 37463            | 266.9 | 4.6599                                      | 37585            | 266.1 |
| $\Delta E(^3\pi\pi)$            | 3.2277                                      | 26033            | 384.1 | 3.2323                                      | 26070            | 383.6 |
| $\Delta E(^1\pi\pi - ^3\pi\pi)$ | 1.4171                                      | 11430            | -     | 1.4276                                      | 11514            | -     |

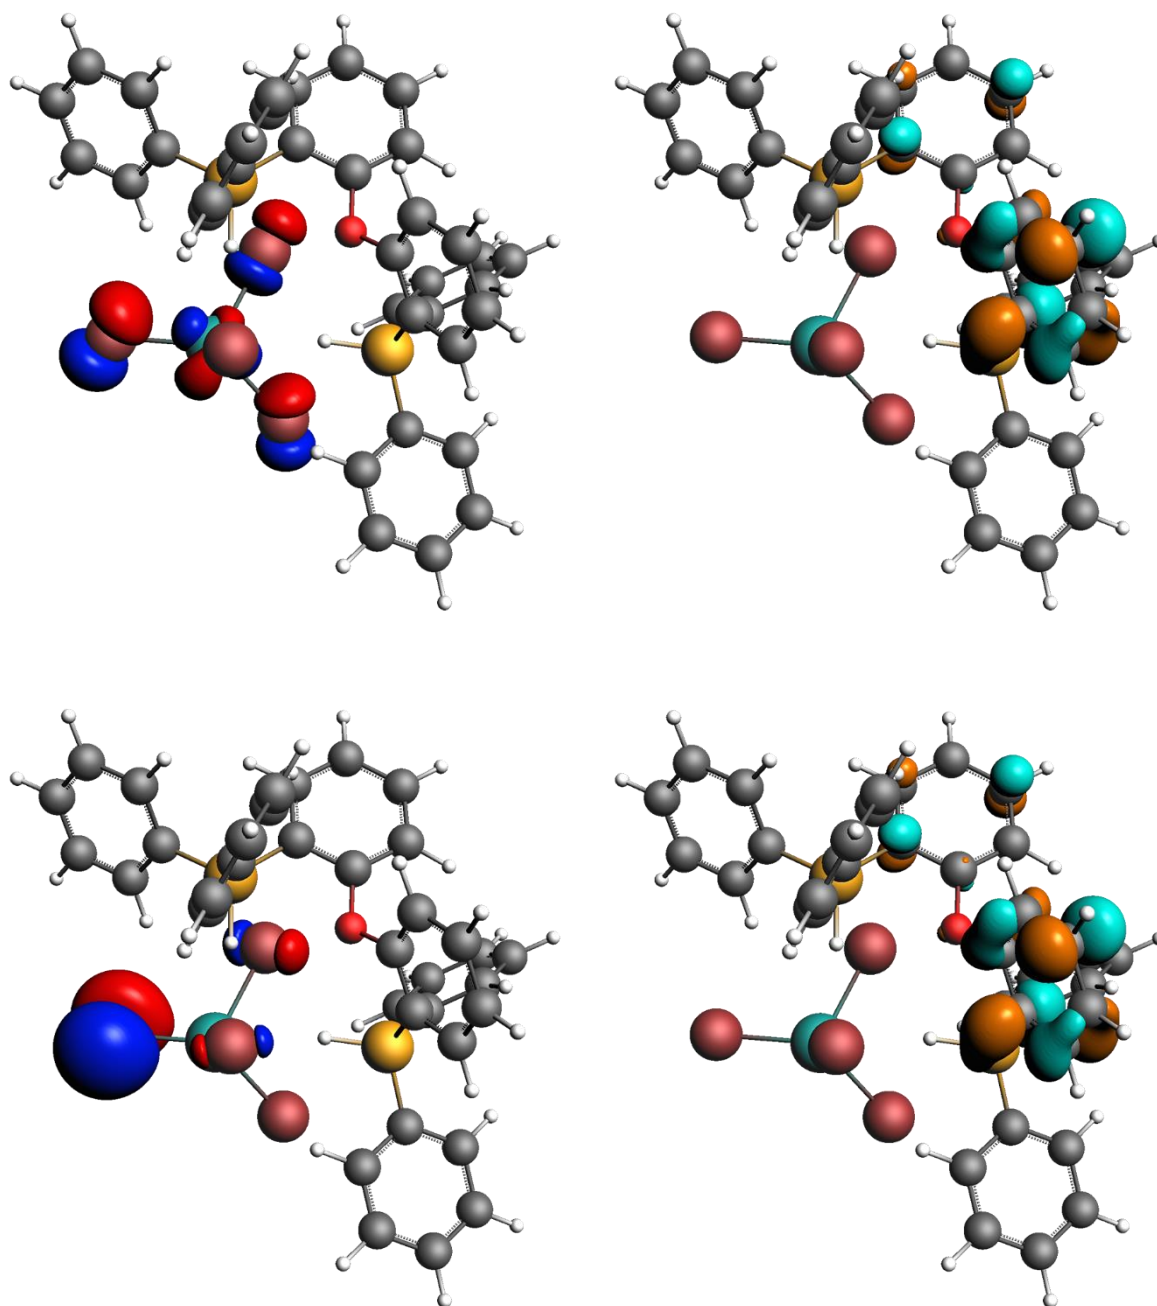

**Fig. S6.** The HOMO (left) and LUMO (right) of **1** for the spin-up (top) and spin-down (bottom) polarizations.

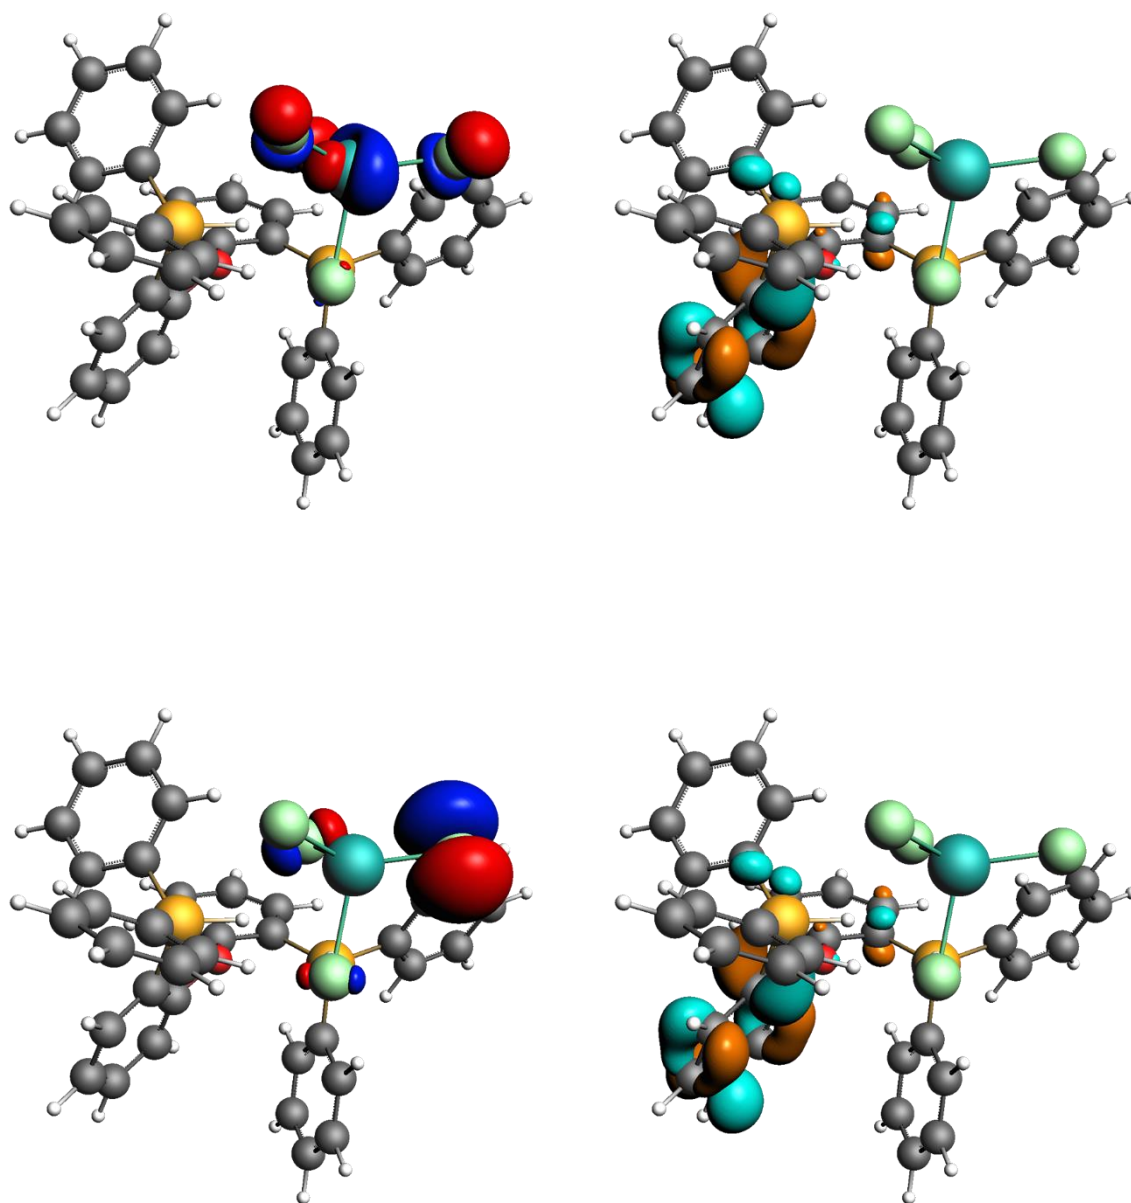

**Fig. S7.** The HOMO (left) and LUMO (right) of **2** for the spin-up (top) and spin-down (bottom) polarizations.

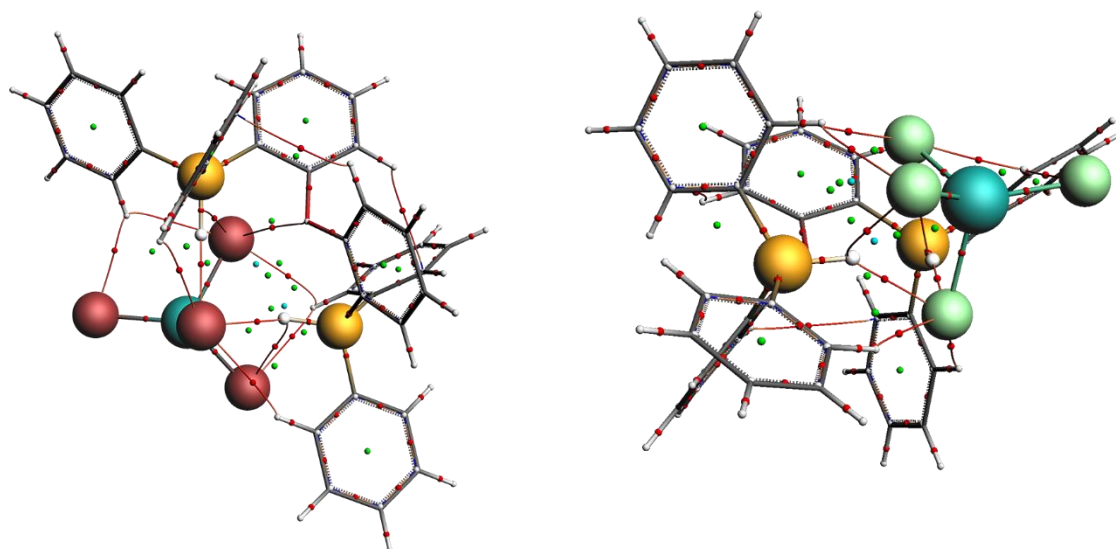

**Fig. S8.** The QTAIM (quantum theory of atoms in molecules) for **1** (left) and **2** (right). Red dot – (3, -1) bond critical points, green dot – (3, +1) ring critical points, turquoise dot – (3, +3) cage critical points, white dot – (3, -3) atom critical points.

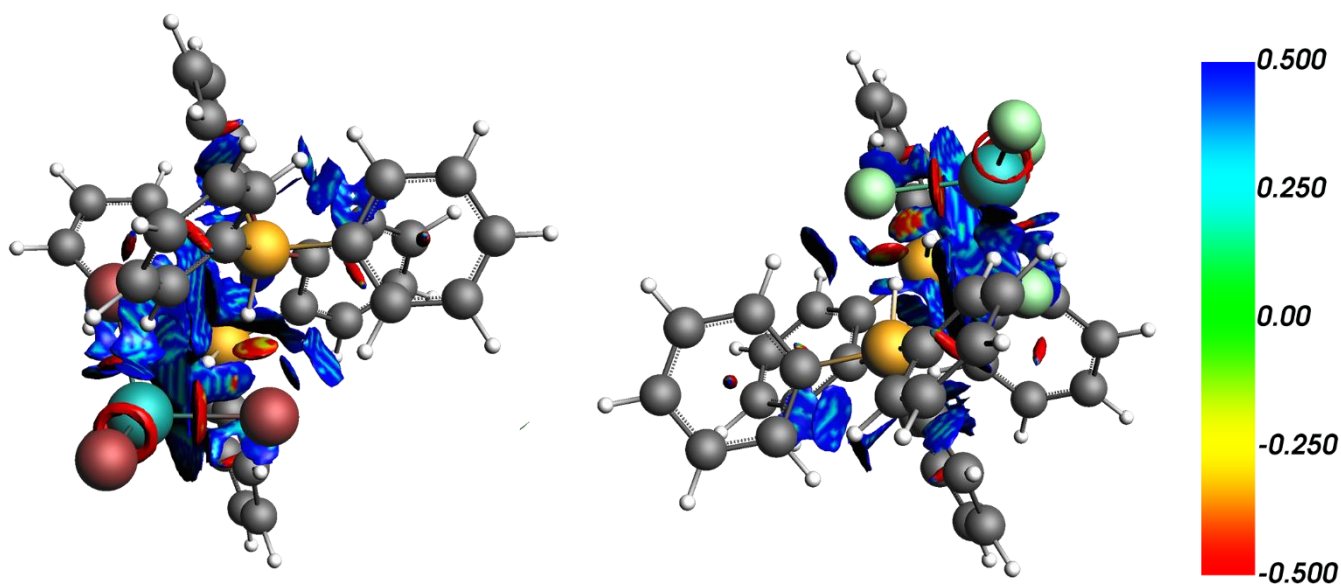

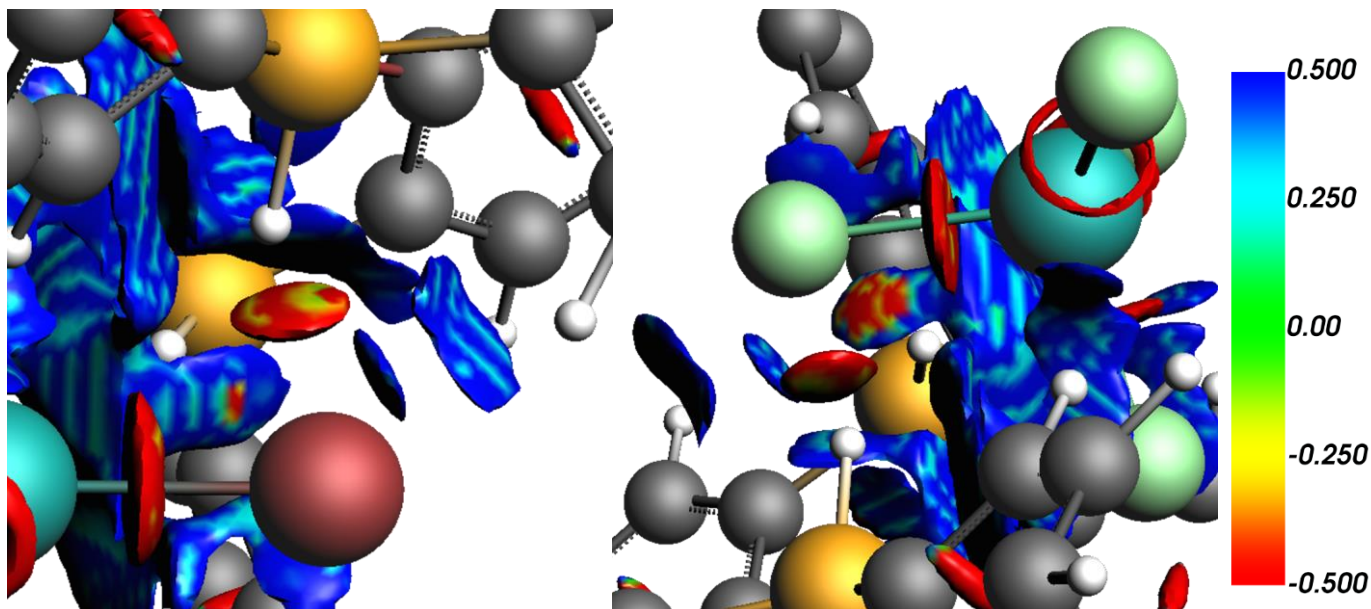

**Fig. S9.** The noncovalent interaction (NCI) plots for **1** (left) and **2** (right) showing PH...X(Mn) interaction. NCIs (SCF density) are presented by isosurfaces ( $s = 0.5$  a.u.,  $\rho = 0.02$  a.u.) colored according to  $\text{sign}(\lambda_2)\rho$  in the red-green-blue scheme.

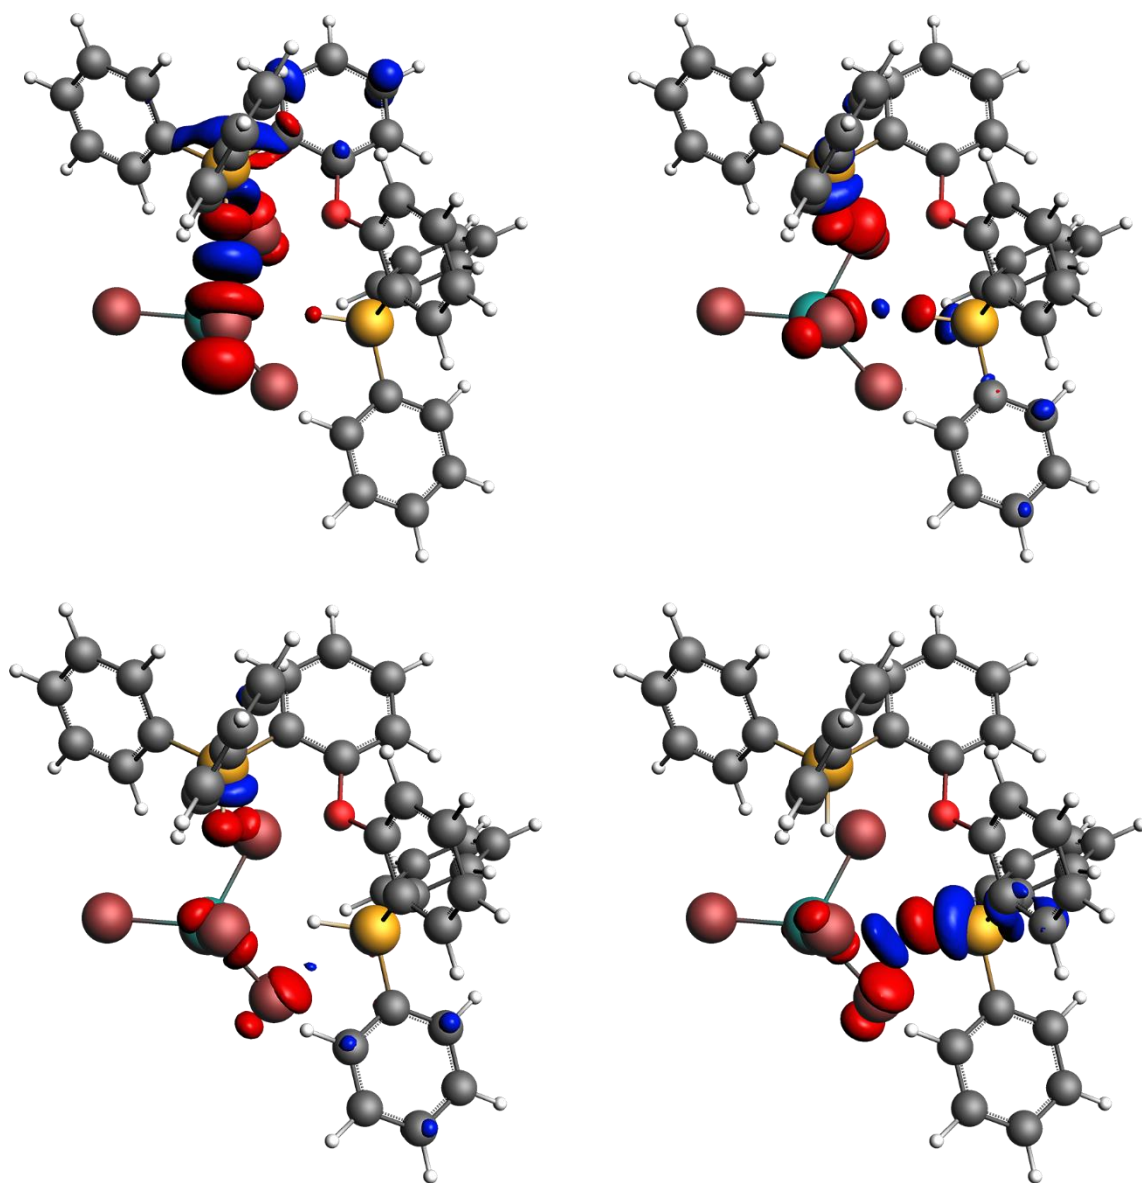



**Fig. S10.** The calculated deformation density  $\Delta\rho_i$  for the  $[\text{MnBr}_4]^{2-}$  anion with  $[\text{H}_2\text{DPEphos}]^{2+}$  cation (**1**) with NOCV eigenvalues  $|V| > 0.1$ : left-top –  $|V| = 0.1904$ ; right-top –  $|V| = 0.1520$ ; left-bottom –  $|V| = 0.1401$ ; right-bottom –  $|V| = 0.1326$ . Red for  $\Delta\rho_i < 0$  and blue for  $\Delta\rho_i > 0$ .

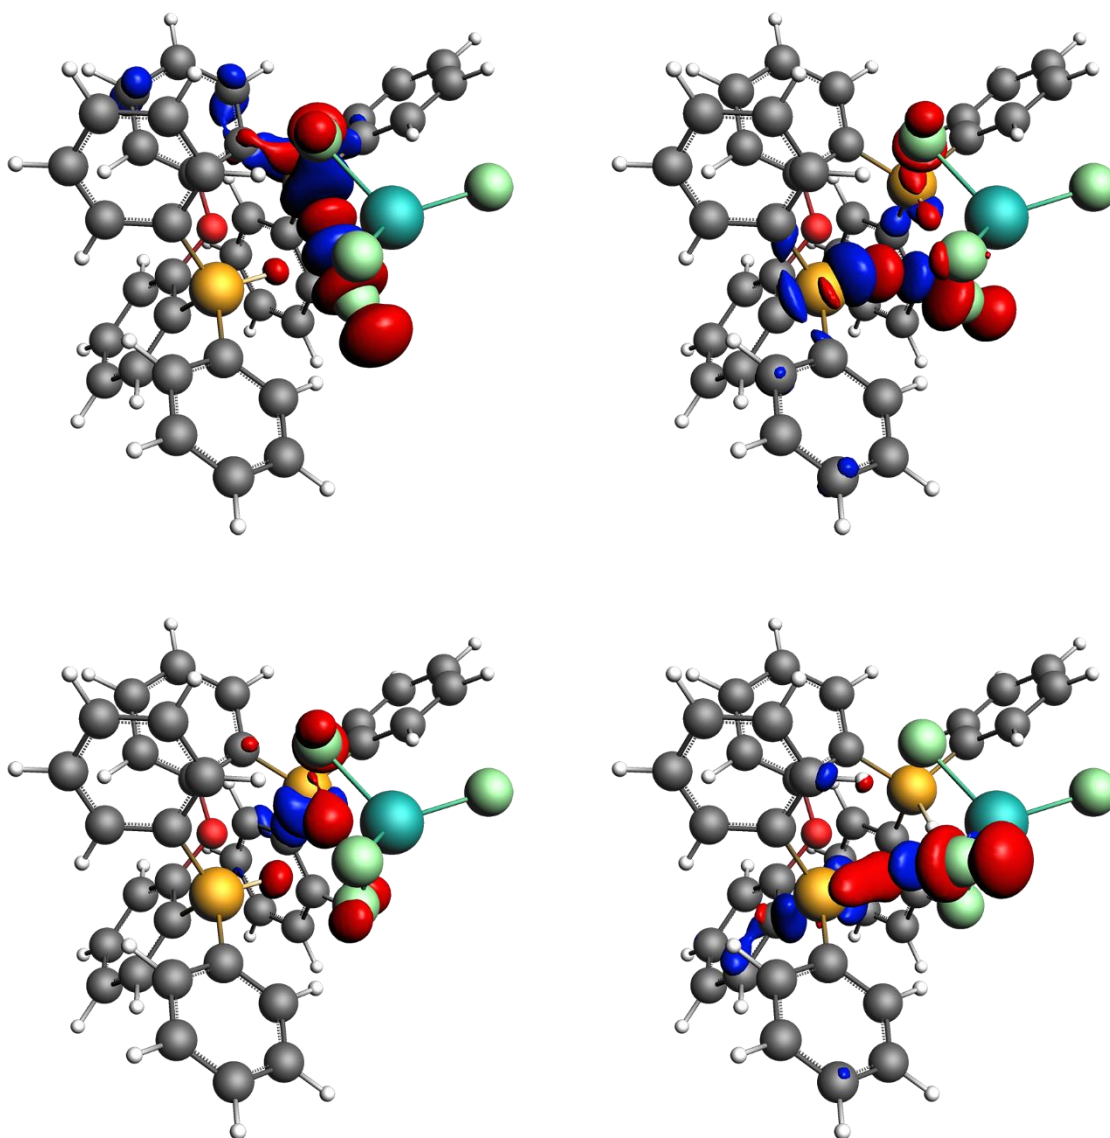

**Fig. S11.** The calculated deformation density  $\Delta\rho_i$  for the  $[\text{MnCl}_4]^{2-}$  anion with  $[\text{H}_2\text{DPEphos}]^{2+}$  cation (**2**) with NOCV eigenvalues  $|V| > 0.1$ : left-top –  $|V| = 0.1840$ ; right-top –  $|V| = 0.1507$ ; left-bottom –  $|V| = 0.1353$ ; right-bottom –  $|V| = 0.1275$ . Red for  $\Delta\rho_i < 0$  and blue for  $\Delta\rho_i > 0$ .

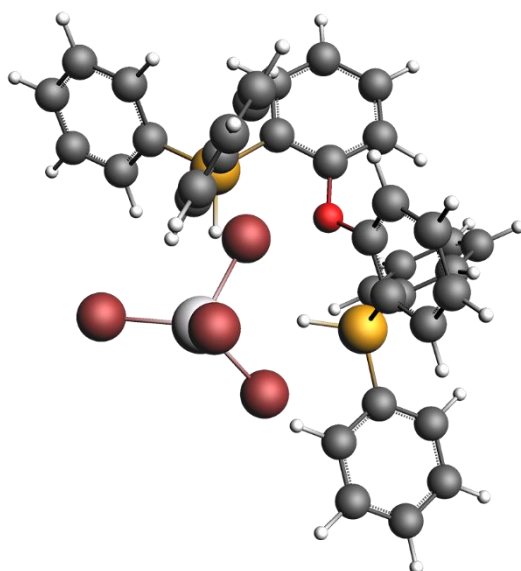

**Fig. S12.** Optimized structure of the [H<sub>2</sub>DPEphos][ZnBr<sub>4</sub>].

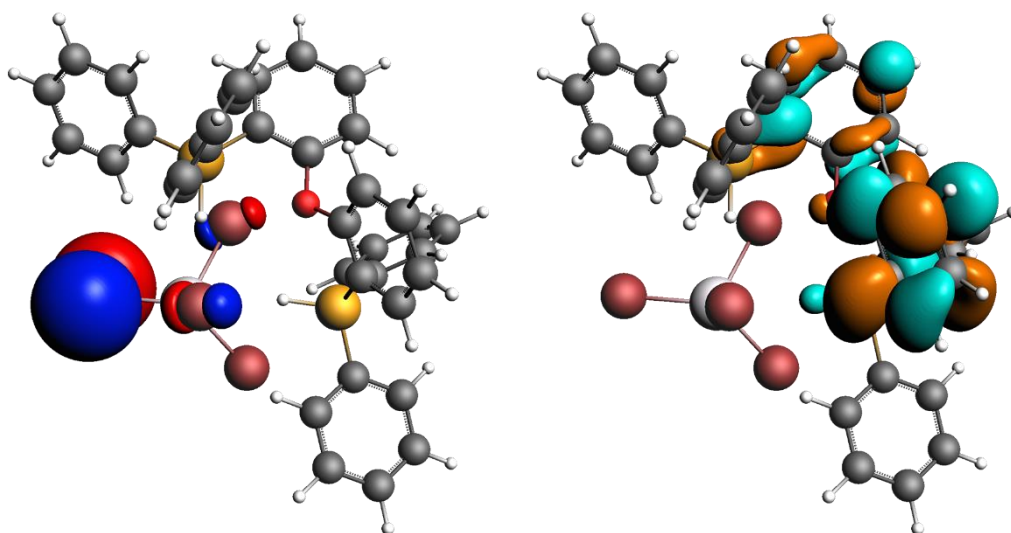

**Fig. S13.** HOMO (left) and LUMO (right) of the [H<sub>2</sub>DPEphos][ZnBr<sub>4</sub>] using BP86 functional.

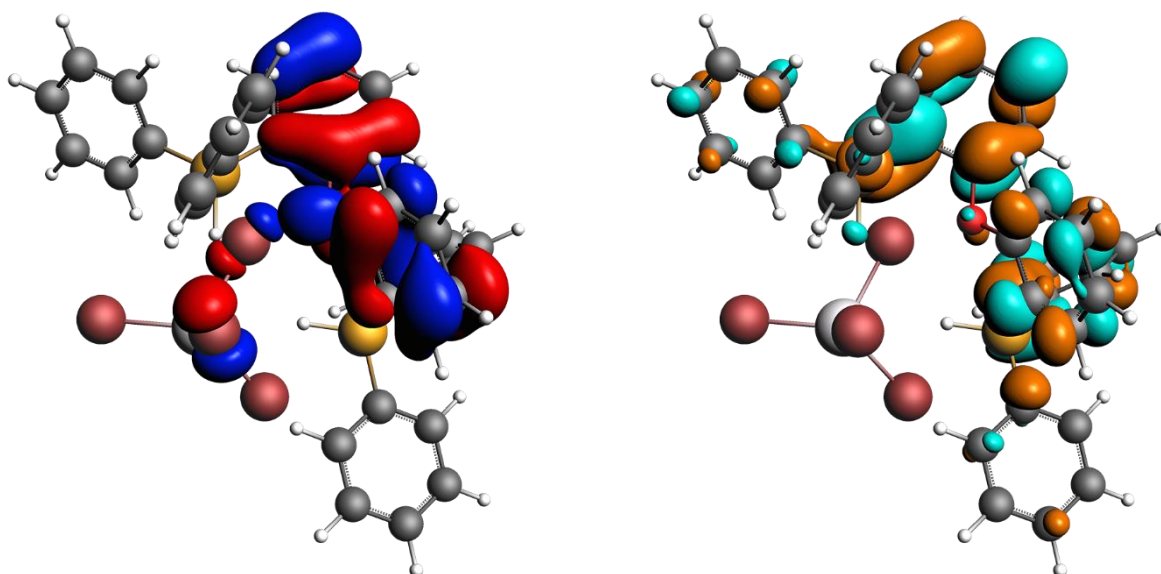

**Fig. S14.** Occupied (HOMO-11) (left) and unoccupied (LUMO+2) (right) orbitals of the [H<sub>2</sub>DPEphos][ZnBr<sub>4</sub>] involved to the singlet-singlet excitation using BP86 functional.

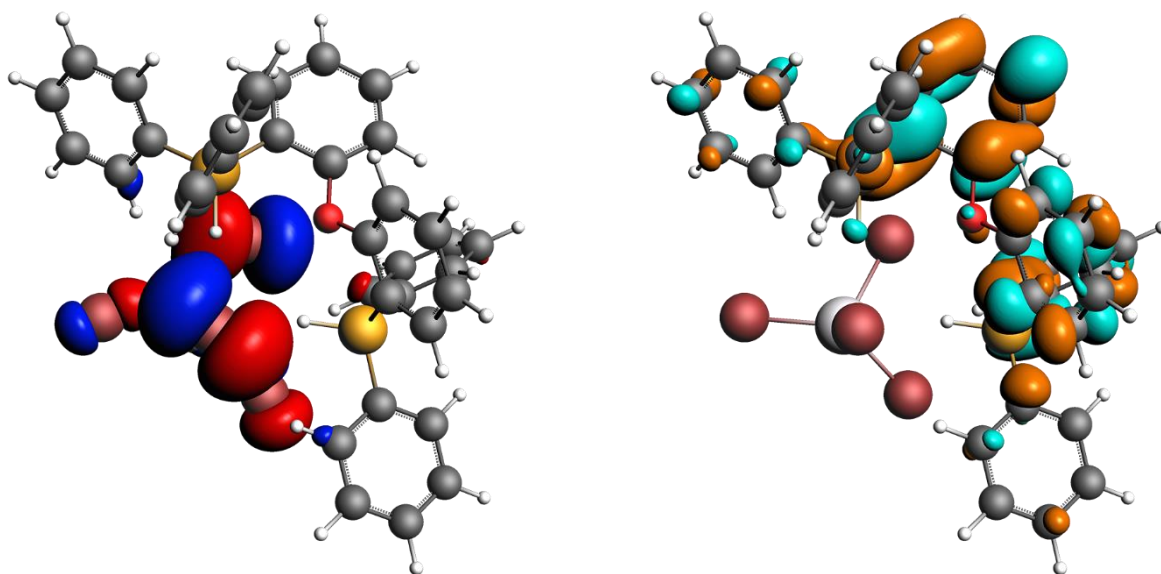

**Fig. S15.** Occupied (HOMO-7) (left) and unoccupied (LUMO+2) (right) of the [H<sub>2</sub>DPEphos][ZnBr<sub>4</sub>] involved to the singlet-triplet excitation using BP86 functional.

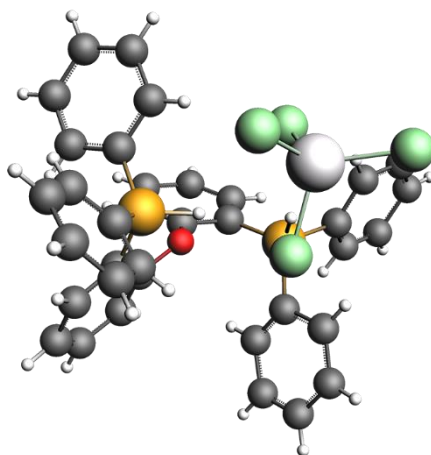

**Fig. S16.** Optimized structure of the [H<sub>2</sub>DPEphos][ZnCl<sub>4</sub>].

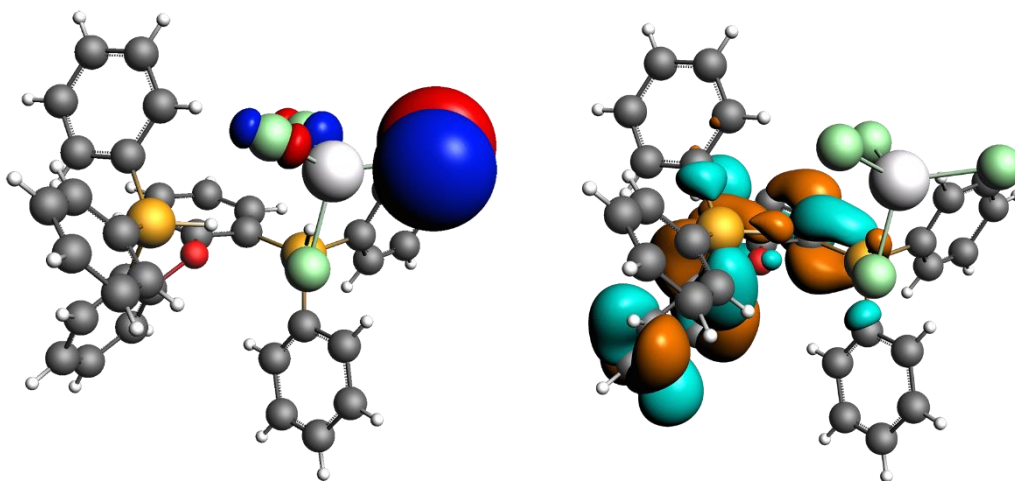

**Fig. S17.** HOMO (left) and LUMO (right) of the [H<sub>2</sub>DPEphos][ZnCl<sub>4</sub>] using BP86 functional.

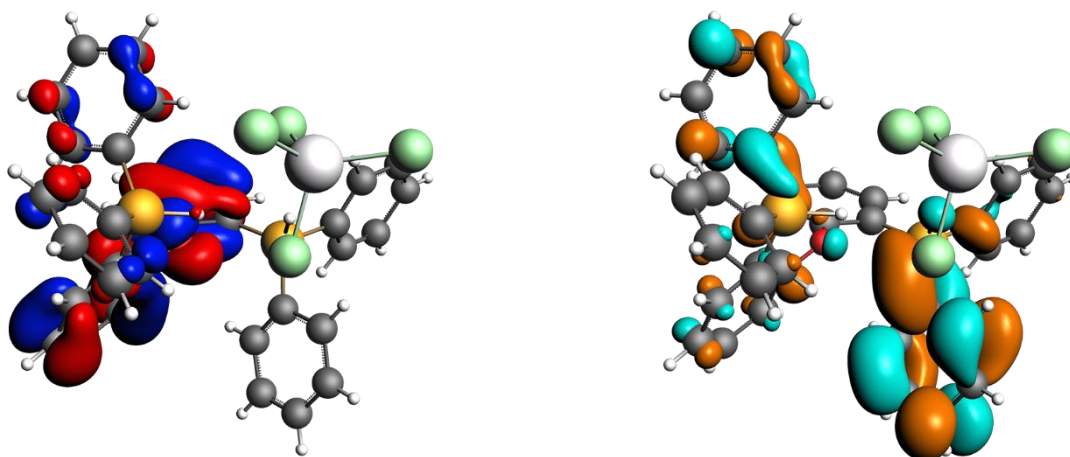

**Fig. S18.** Occupied (HOMO-11) (left) and unoccupied (LUMO+4) (right) orbitals of the  $[\text{H}_2\text{DPEphos}][\text{ZnCl}_4]$  involved to the singlet-singlet excitation using BP86 functional.

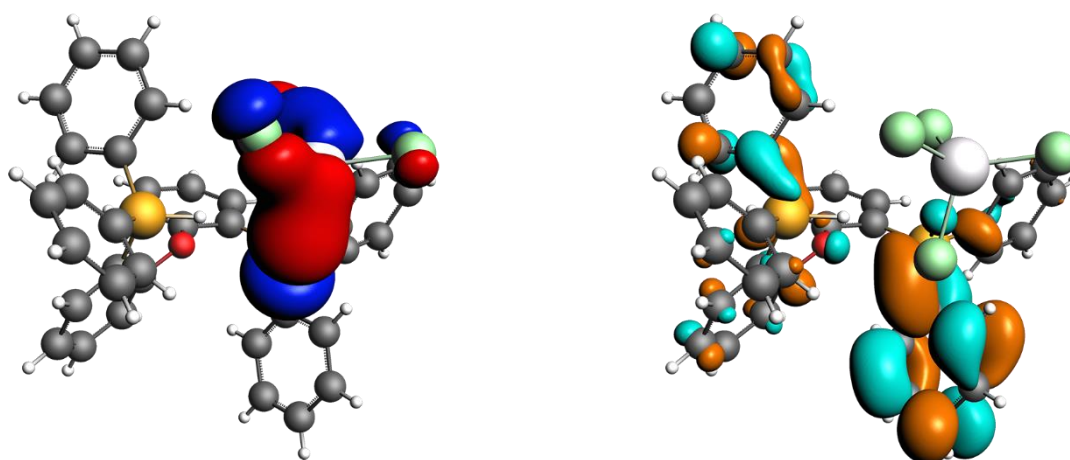

**Fig. S19.** Occupied (HOMO-10) (left) and unoccupied (LUMO+4) (right) orbitals of the  $[\text{H}_2\text{DPEphos}][\text{ZnCl}_4]$  involved to the singlet-triplet excitation using BP86 functional.
